# Supplementary material for: Decoding frequency-modulated signals increases information entropy in bacterial second messenger networks
Source: Research Square preprint supplement (doi:10.21203/rs.3.rs-6166324/v1), 2025-03-20
Supplement: Supplementary file 1 [file 782aa9cb5b314dc0ef037a96.pdf]

## 22 Contents

|    |                                                                                            |           |
|----|--------------------------------------------------------------------------------------------|-----------|
| 23 | <b>Section 1: Supplementary Notes</b>                                                      | <b>4</b>  |
| 24 | Supplementary Note 1: Derivation of the Formula for the M1 . . . . .                       | 4         |
| 25 | Supplementary Note 2: Derivation of the Formula for the M2 . . . . .                       | 5         |
| 26 | Supplementary Note 3: Derivation of the Formula for the M3 . . . . .                       | 6         |
| 27 | Supplementary Note 4: Derivation of Threshold $s^*$ . . . . .                              | 8         |
| 28 | Supplementary Note 5: Simplification of the analytical equation . . . . .                  | 8         |
| 29 | Supplementary Note 6: Derivation of the relationship between $s^*$ and $D$ . . . . .       | 9         |
| 30 | Supplementary Note 7: Construction of the chassis strain for the FDCC. . . . .             | 10        |
| 31 | Supplementary Note 8: Construction of FACs. . . . .                                        | 11        |
| 32 | Supplementary Note 9: Automated experimental workflow. . . . .                             | 12        |
| 33 | Supplementary Note 10: Quantitative characterization of the FDCC. . . . .                  | 13        |
| 34 | Supplementary Note 11: Theoretical fitting of experimental data. . . . .                   | 13        |
| 35 | Supplementary Note 12: Theoretical analysis of expanding bacterial state space through the |           |
| 36 | FDCC. . . . .                                                                              | 14        |
| 37 | Supplementary Note 12.1: Regulation via Dutycycle Modulation. . . . .                      | 14        |
| 38 | Supplementary Note 12.2: Additional Control via Frequency Modulation. . . . .              | 15        |
| 39 | Supplementary Note 12.3: $n$ -Dimensional Analysis. . . . .                                | 16        |
| 40 | Supplementary Note 13: Screening and characterization of cAMP-responsive promoters. . .    | 17        |
| 41 | Supplementary Note 14: Designing experiments to verify the expansion of FAC in the         |           |
| 42 | bacterial gene expression space. . . . .                                                   | 18        |
| 43 | <b>Section 2: Supplementary Figures</b>                                                    | <b>20</b> |
| 44 | Supplementary Figure 1. . . . .                                                            | 20        |
| 45 | Supplementary Figure 2. . . . .                                                            | 21        |
| 46 | Supplementary Figure 3. . . . .                                                            | 22        |
| 47 | Supplementary Figure 4. . . . .                                                            | 23        |
| 48 | Supplementary Figure 5. . . . .                                                            | 24        |
| 49 | Supplementary Figure 6. . . . .                                                            | 24        |
| 50 | Supplementary Figure 7. . . . .                                                            | 24        |
| 51 | Supplementary Movie . . . . .                                                              | 27        |
| 52 | <b>Section 3: Supplementary Tables</b>                                                     | <b>28</b> |
| 53 | Supplementary Table.1: Chemical reactions in the CRN model. . . . .                        | 28        |

|    |                                                                                             |    |
|----|---------------------------------------------------------------------------------------------|----|
| 54 | Supplementary Table.2: Ordinary Differential Equations (ODEs) in the CRN model. . . . .     | 29 |
| 55 | Supplementary Table.3: Kinetetic parameters in the CRN model. . . . .                       | 30 |
| 56 | Supplementary Table.4: The symbols and their meanings used in this study. . . . .           | 31 |
| 57 | Supplementary Table.5: The effect of experimental control parameters on the characteristics |    |
| 58 | of FAC. . . . .                                                                             | 34 |
| 59 | Supplementary Table.6: Bacterial strains used in this study. . . . .                        | 35 |
| 60 | Supplementary Table.7: Plasmids used in this study. . . . .                                 | 40 |
| 61 | Supplementary Table.8: Sequence list of screened cAMP responsive promoters. . . . .         | 42 |

## Section 1: Supplementary Notes

### Supplementary Note 1: Derivation of the Formula for the M1

In order to streamline the computation of the M1 segment, we posit that the deactivation of bPAC\* is instantaneous, halting the synthesis of cAMP immediately upon the cessation of light. Denoting the concentration of cAMP as  $x(t)$ , with  $x_1$  and  $x_2$  representing the concentrations during light and dark phases, respectively, we can derive the following system of differential equations:

$$\begin{cases} \frac{dx_1}{dt} = k - \gamma x_1, \\ \frac{dx_2}{dt} = -\gamma x_2, \end{cases} \quad (1)$$

where  $k$  denotes the synthesis rate of cAMP influenced by bPAC\*, note that this  $k$  includes the influence of [bPAC\*], which leads  $k = k_0[\text{bPAC}^*]$ , and here [bPAC\*] represents the concentration of light-activated bPAC, and  $\gamma$  signifies the hydrolysis rate of cAMP catalyzed by CpdA. The concentration fluctuations of cAMP constitute a periodic signal. It increases during light exposure and decreases during darkness. Therefore, the concentration at the start of each light period corresponds to a trough, while the concentration at the onset of darkness corresponds to a peak. Denoting the initial concentration at the onset of the peak and trough value as  $x_L$  and  $x_H$  respectively.

After the system reaches equilibrium following  $n$  periods, taking this moment as the starting point  $t = 0$ , consider the signal output process for the  $n + 1$  period: During the pulse signal duration  $TD$ , the cAMP concentration can be considered to rise from an initial value of  $x_L$ ; in the remaining time  $TD - T$  without a signal, it decays from an initial value of  $x_H$ . Therefore, we derive the following solutions for  $x_1$  and  $x_2$ :

$$\begin{cases} x_1 = \left(x_L - \frac{k}{\gamma}\right) e^{-\gamma t} + \frac{k}{\gamma} & 0 \leq t \leq TD \\ x_2 = x_H e^{-\gamma(t-TD)} & TD \leq t \leq T \end{cases} \quad (2)$$

Hence, with regard to periodic input, the cAMP concentration at the conclusion of the light phase equals the concentration at the inception of the dark phase, designated as  $x_H$  (representing the peak value of the periodic oscillation). Correspondingly, the concentration at the conclusion of the dark phase aligns with the concentration at the onset of the light phase, denoted as  $x_L$  (representing the

83 trough value of the periodic oscillation). Subsequently, we derive:

$$\begin{cases} x_H = \frac{k}{\gamma} \cdot \frac{1 - e^{-\gamma DT}}{1 - e^{-\gamma T}}, \\ x_L = \frac{k}{\gamma} \cdot \frac{e^{\gamma DT} - 1}{e^{\gamma T} - 1}. \end{cases} \quad (3)$$

84 To validate our findings, we conducted dynamic simulations using MATLAB-SimBiology. The  
 85 results are presented in Fig. 1d, where the horizontal axis represents the scaled period  $\phi = \gamma T$   
 86 (with  $\gamma$  denoting the cAMP hydrolysis rate and  $T$  representing the actual period), while the vertical  
 87 axis depicts the normalized amplitude of cAMP, relative to the maximum value under the current  
 88 conditions,  $[\text{cAMP}]_{\max} = k/\gamma$ .

89 Upon comparing the derived formulas with the simulation outcomes, we affirm the reliability of  
 90 the established formulas thus far. Employing the aforementioned scaling approach and introducing  
 91  $\tau = \gamma t$ , akin to  $\phi, s_1, s_2, s_H, s_L$  represent the scaled values of  $x_1, x_2, x_H, x_L$  normalized by  $[\text{cAMP}]_{\max}$ .

$$\begin{cases} s_H = \frac{1 - e^{-\phi D}}{1 - e^{-\phi}} \\ s_L = \frac{e^{\phi D} - 1}{e^{\phi} - 1} \end{cases} \quad (4)$$

## 92 **Supplementary Note 2: Derivation of the Formula for the M2**

93 As a secondary messenger, cAMP regulates protein transcription through two sequential Hill  
 94 reactions. cAMP forms a complex with the regulatory protein Vfr, resulting in the formation of the  
 95 Vfr-cAMP complex. Assuming an apparent dissociation constant of  $K_1$  and a Hill coefficient of  $n = 2$   
 96 for the binding reaction, with the protein Vfr being constitutively expressed. For clarity, denote the  
 97 initial average concentrations of Vfr and Plac as  $[\text{Vfr}]_0$  and  $[\text{Plac}]_0$  respectively, and represent the  
 98 cAMP concentration as  $[\text{cAMP}]$ .

99 The binding of the Vfr-cAMP complex to the promoter Plac is assumed to have an apparent  
 100 dissociation constant of  $K_2$  and a Hill coefficient of  $n = 1$  for the binding reaction. Assuming rapid  
 101 equilibrium is reached in the reaction, the concentration of the activated-DNA at equilibrium is  
 102 denoted as  $[\text{Activated-Plac}]$ .

103 The following relationships can be delineated:

$$\begin{cases} [\text{Vfr-cAMP Complex}] = \frac{[\text{Vfr}]_0 [\text{cAMP}]^2}{K_1^2 + [\text{cAMP}]^2} \\ [\text{Activated-Plac}] = \frac{[\text{Plac}]_0 [\text{Vfr-cAMP Complex}]}{K_2 + [\text{Vfr-cAMP Complex}]} = \frac{[\text{Plac}]_0}{1 + \frac{K_2}{[\text{Vfr}]_0} \left[ 1 + \left( \frac{K_1}{[\text{cAMP}]} \right)^2 \right]} \end{cases} \quad (5)$$

104 Both Hill binding reactions adhere to the same principle. A dynamic simulation was executed to  
 105 validate the association between the initial concentration of cAMP and the activation state of the  
 106 final product following two Hill reactions, illustrated in Fig. 2e. This figure vividly portrays that the  
 107 equations aptly encapsulate the kinetic attributes of the reaction.

### 108 **Supplementary Note 3: Derivation of the Formula for the M3**

109 In accordance with the gene circuit designed in Fig. 1b, we will fuse GFP fluorescent protein as the  
 110 output of the genetic circuit after activating the promoter Plac. Upon determining the concentration of  
 111 Activated-Plac, the protein expression level can be viewed as the linear amplification of the promoter:

$$[\text{GFP}] = \frac{k_{\text{trans}}}{k_{\text{deg}}} [\text{Activated-Plac}] = \frac{k_1 k_2}{k_{\text{deg1}} k_{\text{deg2}}} \frac{[\text{Plac}]_0}{1 + \frac{K_2}{[\text{Vfr}]_0} \left[ 1 + \left( \frac{K_1}{[\text{cAMP}]} \right)^2 \right]} \quad (6)$$

112 We reduce the GFP concentration by  $\frac{k_{\text{trans}}}{k_{\text{deg}}} [\text{Plac}]_0$ . In order to simplify the expression, we introduce  
 113  $\alpha = \frac{k}{\gamma K_1}$  and  $\lambda = \frac{[\text{Vfr}]_0}{K_2}$ . By substituting the reduced cAMP concentration  $s(\tau)$ , we derive:

$$\psi(\tau) = \frac{\lambda \alpha^2 s(\tau)^2}{1 + (\lambda + 1) \alpha^2 s(\tau)^2} \quad (7)$$

114 This equation represents the integrand function. To determine the average value at the equilibrium  
 115 state, we integrate it over one period from 0 to  $T$ . Due to the complexity of this integration, direct  
 116 solutions are unattainable via mathematical or analytical methods. Thus, we resort to simplifying  
 117 the formula to approximate a solution.

118 Upon examining the integrand  $\psi(\tau)$ , containing terms like  $\lambda \alpha^2 s(\tau)^2$  and  $(\lambda + 1) \alpha^2 s(\tau)^2$  in both  
 119 the numerator and denominator, if  $\lambda$  is sufficiently large, we can approximate  $\lambda + 1 \approx \lambda$ . Experimental  
 120 conditions validate this approximation. Consequently, we define  $\theta \equiv \lambda \alpha^2 \approx (\lambda + 1) \alpha^2$ , which simplifies  
 121 the integrand to:  $\psi(\tau) = \frac{\theta s^2(\tau)}{1 + \theta s^2(\tau)}$ .

122 Then, the ultimate objective is to compute the integral below, which quantifies the GFP  
 123 production in one period at steady-state:

$$\bar{y} = f \int_0^{1/f} \frac{\theta s^2(\tau)}{1 + \theta s^2(\tau)} d\tau \quad (8)$$

124 Considering that one cycle can be segregated into two phases, illuminated and dark, the equation  
 125 can be rephrased as:

$$\bar{y} = f \left( \int_0^{D/f} \frac{\theta s_1^2(\tau)}{1 + \theta s_1^2(\tau)} d\tau + \int_{D/f}^{1/f} \frac{\theta s_2^2(\tau)}{1 + \theta s_2^2(\tau)} d\tau \right) \quad (9)$$

126 By deriving  $\frac{ds_1}{d\tau} = (1 - s_L)e^{-\tau} = 1 - s_1$  and  $\frac{ds_2}{d\tau} = -s_H e^{-\tau + D/f} = -s_2$ , the equation is simplified  
 127 to:

$$\begin{aligned} \bar{y} &= f \left( \int_{s_L}^{s_H} \frac{\theta s_1^2}{(1 + \theta s_1^2)(1 - s_1)} ds_1 + \int_{s_H}^{s_L} \frac{\theta s_2^2}{-s_2(1 + \theta s_2^2)} ds_2 \right) \\ &= f \int_{s_L}^{s_H} \frac{\theta s}{(1 + \theta s^2)(1 - s)} ds \end{aligned} \quad (10)$$

128 After analysis, it is determined that:  $s_H = \frac{1 - e^{-D/f}}{1 - e^{-1/f}} = \frac{\sinh(\frac{D}{2f})}{\sinh(\frac{1}{2f})} e^{\frac{1-D}{2f}}$ ,  $s_L = \frac{e^{D/f} - 1}{e^{1/f} - 1} =$

129  $\frac{\sinh(\frac{D}{2f})}{\sinh(\frac{1}{2f})} e^{-\frac{1-D}{2f}}$ .

130 Using this, the integral can be solved with the aid of software like *Mathematica*, yielding:

$$\bar{y}(\theta, f, D) = f \left[ \frac{\theta}{1 + \theta} \ln \left( \frac{(1 - s_L)\sqrt{1 + \theta s_H^2}}{(1 - s_H)\sqrt{1 + \theta s_L^2}} \right) - \frac{\sqrt{\theta}}{1 + \theta} \tan^{-1} \left( \frac{\sqrt{\theta}(s_H - s_L)}{1 + \theta s_H s_L} \right) \right] \quad (11)$$

131 Further, using the relation  $D = f \ln \left( \frac{1 - s_L}{1 - s_H} \right)$ , the equation simplifies to:

$$\bar{y}(\theta, f, D) = f \left[ \frac{\theta}{1 + \theta} \ln \left( \frac{\sqrt{1 + \theta s_H^2}}{\sqrt{1 + \theta s_L^2}} \right) - \frac{\sqrt{\theta}}{1 + \theta} \tan^{-1} \left( \frac{\sqrt{\theta}(s_H - s_L)}{1 + \theta s_L s_H} \right) \right] + \frac{\theta D}{1 + \theta} \quad (12)$$

132 If we refrain from simplifying using  $\theta = \lambda\alpha^2 = (\lambda + 1)\alpha^2$ , the resulting equation would be:

$$\begin{aligned} \bar{y}(\alpha, f, D, \lambda) = f & \left[ \frac{\lambda\alpha^2}{1 + (\lambda + 1)\alpha^2} \ln \left( \frac{\sqrt{1 + (\lambda + 1)\alpha^2 s_H^2}}{\sqrt{1 + (\lambda + 1)\alpha^2 s_L^2}} \right) \right. \\ & - \frac{\alpha\lambda/\sqrt{\lambda + 1}}{1 + (\lambda + 1)\alpha^2} \tan^{-1} \left( \frac{\alpha\sqrt{\lambda + 1}(s_H - s_L)}{1 + (\lambda + 1)\alpha^2 s_L s_H} \right) \Big] \\ & + \frac{\lambda\alpha^2 D}{1 + (\lambda + 1)\alpha^2} \end{aligned} \quad (13)$$

### 133 **Supplementary Note 4: Derivation of Threshold $s^*$**

134 To simplify the given equation, we introduce a critical threshold, denoted as  $s^*$ , represent-  
135 ing the cAMP concentration where the M2 filter achieves maximum sensitivity. By defining  $\alpha =$   
136  $\frac{k}{\gamma K_1}$  and  $\lambda = \frac{[\text{Vfr}]_0}{K_2}$ , we reduce the expression for the transcription factor-DNA binding to:

$$137 \quad [\text{Activated-DNA}] = \frac{[\text{Plac}]_0 [\text{Vfr-cAMP Complex}]}{K_2 + [\text{Vfr-cAMP Complex}]} = \frac{[\text{Plac}]_0}{1 + \frac{K_2}{[\text{Vfr}]_0} \left[ 1 + \left( \frac{K_1}{[\text{cAMP}]} \right)^2 \right]}.$$

138 By non-dimensionalizing  $[\text{Activated-Plac}]$  using  $[\text{Plac}]_0$ , we represent the dimensionless  
139  $[\text{Activated-Plac}]$  as  $\psi$  and the dimensionless  $[\text{cAMP}]$  as  $s$ , leading to the simplified relationship:

$$140 \quad \psi = \frac{1}{1 + \frac{1}{\lambda} \left( 1 + \frac{1}{\alpha^2 s^2} \right)}.$$

141 Due to the threshold filter being a second-order Hilbert function, we define the position where the  
142 curve changes most sensitively, namely where the second derivative is zero, as the threshold. To find  
143 the threshold, we solve for  $\psi'' = 0$ , resulting in:  $s^* \equiv \sqrt{\frac{1}{3\alpha^2(1 + \lambda)}}$ .

144 Moreover, for  $\psi'' = 0$ , the condition  $\alpha(1 + \lambda) > \frac{1}{3}$  must be satisfied, a condition typically met in  
145 experimental setups.

146 This refined formulation represents a crucial step towards understanding the dynamics of the  
147 system, particularly in delineating the critical cAMP concentration where the M2 filter attains peak  
148 sensitivity.

### 149 **Supplementary Note 5: Simplification of the analytical equation**

150 Here we define  $y^*$  as the normalized protein expression level under continuous illumination, corre-  
151 sponding to a duty cycle of 1. Under continuous constant light intensity conditions (i.e.,  $D = 1, s_H =$   
152  $s_L$ ), the steady-state average expression can be formulated as  $y^* \equiv \bar{y}_{(\alpha, f, D=1, \lambda)} = \frac{\lambda\alpha^2}{1 + (\lambda + 1)\alpha^2}$ .  
153 In the process of formula derivation, bPAC\* undergoes instantaneous inactivation, and the issue of  
154 promoter leak expression is not considered. However, in specific genetic circuits, gene expression  
155 unavoidably includes leakage. To exclude these influences, we calculate  $Y$ , denoted as  $Y = \frac{\bar{y}}{y^*}$ . In  
156 experiments,  $Y$  is computed by subtracting the expression level of the unillumination group and then

dividing by the difference between the continuous illumination and unillumination group's expression levels.

$$Y = \frac{\bar{y}}{y^*} = D + f \left[ \ln \left( \sqrt{\frac{1 + (\frac{s_H}{\sqrt{3}s^*})^2}{1 + (\frac{s_L}{\sqrt{3}s^*})^2}} \right) - \sqrt{3}s^* \left( \tan^{-1} \frac{\frac{s_H}{\sqrt{3}s^*} - \frac{s_L}{\sqrt{3}s^*}}{1 + \frac{s_H}{\sqrt{3}s^*} \frac{s_L}{\sqrt{3}s^*}} \right) \right] \quad (14)$$

Introducing:

$$G = f \left[ \frac{1}{2} \ln \left( \frac{1 + (\frac{s_H}{\sqrt{3}s^*})^2}{1 + (\frac{s_L}{\sqrt{3}s^*})^2} \right) - \sqrt{3}s^* \left( \tan^{-1} \frac{\frac{s_H}{\sqrt{3}s^*} - \frac{s_L}{\sqrt{3}s^*}}{1 + \frac{s_H}{\sqrt{3}s^*} \frac{s_L}{\sqrt{3}s^*}} \right) \right] \quad (15)$$

, we propose that this signifies the impact of the frequency component of the input information on the ultimate output. Further simplification leads to  $Y = \frac{\bar{y}}{y^*} = D + G$ , where  $Y$  represents the relationship between the average output and the steady-state average expression.

## Supplementary Note 6: Derivation of the relationship between $s^*$ and $D$

Here, we will elucidate why under the condition  $Y_{HF} - Y_{LF} = 0$ , the relationship between  $D$  and  $s^*$  is established as  $D = 3(s^*)^2$ , as shown in Fig. 2b. It is crucial to emphasize that this is an idealized scenario and not practically attainable in experimental setups.

The difference between the high-frequency and low-frequency response is defined by  $\bar{y}_{HF} - \bar{y}_{LF} = \lim_{f \rightarrow \infty} \bar{y} - \lim_{f \rightarrow 0} \bar{y}$ .

When  $\bar{y}_{HF}$  exceeds  $\bar{y}_{LF}$ , the genetic circuit is referred to as High-Pass FAC. Conversely, it is a Low-Pass FAC when  $\bar{y}_{LF}$  exceeds  $\bar{y}_{HF}$ . To find the critical point, we calculate the scenario where the difference between  $\bar{y}_{LF}$  and  $\bar{y}_{HF}$  is zero.

Given  $s_H = \frac{1 - e^{-D/f}}{1 - e^{-1/f}}$  and  $s_L = \frac{e^{D/f} - 1}{e^{1/f} - 1}$ , it follows that  $\lim_{f \rightarrow \infty} s_H = \lim_{f \rightarrow \infty} s_L = D$ , while  $\lim_{f \rightarrow 0} s_H = 1$ ,  $\lim_{f \rightarrow 0} s_L = 0$ , as shown in Fig. 2d. Using these relations, we obtain:  $\lim_{f \rightarrow \infty} \bar{y} = \frac{\lambda \alpha^2 D}{1 + (\lambda + 1)\alpha^2}$ . To

ensure  $\bar{y}_{HF} = \bar{y}_{LF}$ , it is required that  $\lim_{f \rightarrow \infty} \bar{y} = \frac{\lambda \alpha^2 D}{1 + (\lambda + 1)\alpha^2}$ , so as:

$$\lim_{f \rightarrow \infty} \left( \frac{1}{2} \frac{\lambda \alpha^2}{1 + (\lambda + 1)\alpha^2} \ln \left( \frac{1 + (\lambda + 1)\alpha^2 s_H^2}{1 + (\lambda + 1)\alpha^2 s_L^2} \right) - \frac{\alpha \lambda / \sqrt{\lambda + 1}}{1 + (\lambda + 1)\alpha^2} \tan^{-1} \left( \frac{\alpha \sqrt{\lambda + 1} (s_H - s_L)}{1 + (\lambda + 1)\alpha^2 s_L s_H} \right) \right) = 0$$

. Furthermore, considering  $\lim_{f \rightarrow \infty} s'_H(f) = \frac{D(1-D)}{2}$  and  $\lim_{f \rightarrow \infty} s'_L(f) = -\frac{D(1-D)}{2}$ , solving these equations leads to  $D = 3(s^*)^2$ . Therefore, when the relationship between  $D$  and  $s^*$  satisfies  $D = 3(s^*)^2$ ,  $\bar{y}_{HF} = \bar{y}_{LF}$ .

## Supplementary Note 7: Construction of the chassis strain for the FDCC.

In the construction of the FDCC, *Pseudomonas aeruginosa* PAO1 was meticulously selected as the foundational bacterium to ensure the precision of the cAMP synthesis and degradation pathways. This strain carries two cAMP synthesis genes (*cyaA-cyaB*) and one cAMP degradation gene (*cpdA*). For controlled signal input, the gene bPAC was specifically chosen for its involvement in blue light-induced cAMP synthesis. Initially, the synthesis genes *cyaA-cyaB* were removed from the PAO1 strain, and the gene fragment for persistent expression of the bPAC protein is inserted into the bacterial genome using the CTX system. To address biosafety concerns, the virulence factors ExoS and ExoT were methodically eliminated to enhance safety protocols. Ensuring data integrity and reliability required a strict emphasis on maintaining the bacteria in the logarithmic growth phase, achieved through continuous dilution and cultivation. However, challenges arose during continuous cultivation as PAO1 tended to form biofilms at the air-liquid interface, resulting in the presence of aggregates during sampling and potential inaccuracies in plate reader analyses. To tackle these issues, gene clusters *pslBCD* and *pelA* were systematically deleted to engineer a strain incapable of forming robust biofilms.

Consequently, the genotype of our chassis cells is: PAO1- $\Delta pslBCD\Delta pelA\Delta exoS\Delta exoT\Delta cyaA\Delta cyaB$ , and this strain is designated as FAC01. Using the CTX transposon insertion method, we inserted a fragment containing the PA1/O4/O3 strong promoter and *bPAC* into the FAC01 genome, resulting in the creation of the FAC03 strain.

We utilized the CRISPR knockout method to achieve seamless deletion and insertion of segments in the PAO1 genome. The experimental protocol was optimized based on existing literature, using the deletion of the *cyaA* gene as a model. The detailed experimental procedure is outlined as follows:

### 1. Construction of Plasmid PCRISPR-*cyaA*:

- (a) Use the PAO1 genome as a template to PCR amplify around 500bp upstream and downstream homologous arms (*cyaA*-up and *cyaA*-dn segments), and obtain *cyaA*-up-dn segment through overlap amplification.
- (b) Amplify the N20-gRNA segment with primers containing the N20 segment.
- (c) Linearized plasmid vector segment PCRISPR.
- (d) Utilizing Gibson cloning technology, we successfully linked three segments to assemble the plasmid PCRISPR.

### 2. CRISPR-Cas9 Knockout Process:

- (a) Transform the plasmid PCASPA, which contains CAS9, into the PAO1 strain.
- (b) Select single clone colonies on an antibiotic plate with 100  $\mu$ g/mL tetracycline.

- (c) Incubate the colonies overnight in LB + tetracycline, dilute 1:50 in fresh LB, induce CAS9 expression with 0.02% arabinose, and continue culturing for 2 hours.
  - (d) Collect the bacterial culture, prepare electrocompetent cells, electroporate the plasmid PCRISPR-*cyaA*, and plate on a double-resistant plate with tetracycline and carbenicillin.
3. Gene Knockout Verification:
- (a) PCR confirmation of the successful knockout of the target gene *cyaA* in the resulting colonies.
  - (b) Pick colonies and culture them overnight on LB agar plates without sodium chloride with 15% (wt) sucrose.
  - (c) Subculture colonies on LB plates containing tetracycline and carbenicillin to confirm complete plasmid loss.
  - (d) Sequence verification will confirm the PAO1- $\Delta$ *cyaA* strain.

## Supplementary Note 8: Construction of FACs.

In our CRN and Theoretical model, the expression of *vfr* and *cpdA* genes is not affected by cAMP. However, in the wild-type PAO1 strain, their transcription is cAMP-regulated. Therefore, the initial step involves substituting their native promoters on the genome with persistent, cAMP-independent promoters in FAC03. This substitution will be achieved using CRISPR technology.

According to analytical formula predictions, the expression levels of *vfr*, *cpdA*, and *bPAC* directly impact the functionality of the FDCC (Supplementary Figure 3). Achieving an optimized frequency response in the FDCC necessitates precise regulation of these three genes' expression levels. This regulation entails fine-tuning their expression by manipulating promoters and Ribosome Binding Sites (RBS). Promoters such as J23106-J23115-J23110-J23100-J23102 and RBS variants like B0034-RBS046-RBS004-RBS017-RBS021 were employed in the experimental setup (doi: 10.1093/nsr/nwad031). Comprehensive details concerning the engineered strains are delineated in Supplementary Table 6.

The influence of these proteins on the performance of the FDCC is illustrated in Supplementary Figure 3. According to the theoretical curve, we needed to comprehensively adjust the expression levels of *vfr* and *cpdA*. Subsequently, after multiple optimizations, we obtained the bacterial strain FAC03C17V17 with a very pronounced High-Pass FAC.

The strain construction process adheres to the CRISPR gene insertion experimental protocol. For instance, in the replacement of the *vfr* upstream promoter with J23102-RBS017, a plasmid, J23102-RBS017-*vfr*-PCRISPR, is constructed. This plasmid contains the N20-gRNA, the insert fragment J23102-RBS017, and homologous segments. Utilizing the PAO1 genome as a template, integrate the

promoter and RBS sequences upstream of the *vfr* homologous through the PCR process. Subsequently, connect them to the downstream homologous arm of *vfr* via overlap PCR. Then, the specific N20-gRNA and UP-J23102-RBS017-DN fragments are inserted into the plasmid PCRISPR using the Gibson assembly technique. Following the CRISPR gene deletion approach, the plasmid is electroporated into FAC03 to yield strains with the replaced promoters, denoted as FAC03V17. Further replacement of the promoter preceding *cpdA* with J23100-RBS017 leads to a strain designated as FAC03C17V17-NP (without plasmid).

To measure the intracellular expression level of cAMP, we constructed a plasmid, Plac-*sfGFP*-T0T1-J23102-*CyOFP*-pJN105, and electroporated it into various chassis cells. The constitutively expressed CyOFP fluorescent protein serves as an internal standard for normalizing bacterial growth differences. The change in intracellular cAMP concentration is calculated by comparing the ratio of *sfGFP* to CyOFP.

## Supplementary Note 9: Automated experimental workflow.

The bacterial culture, cultivated in FAB medium to the logarithmic phase, was aliquoted into a black 96-well plate, with 110  $\mu$ L in each well. The OPCU device was then programmed via computer to input light control parameters such as intensity ( $I$ ), period ( $T$ ), duty cycle ( $D$ ), and start time. Subsequently, a programmed automated experimental workflow was implemented to control the operation of the automation island. The automated workflow is shown in [Supplementary Figure 4](#). Experimental consumables were positioned in PlateHotels on the automation island, initiating the automated experiment.

The detailed procedure of the automated experimental workflow is outlined as follows: The OPCU device, containing the bacterial culture, was initially transported by a robotic arm to the shaking incubator for a 20-minute incubation period, then moved to the Liquid Handlers for bacterial culture dilution. Subsequently, 50  $\mu$ L of the culture was extracted and added to a Corning 3590 plate, which was then directed to the Microplate Reader for absorbance measurements at 600 nm and fluorescence intensity readings for *sfGFP* (470-520 nm), CyOFP (488-590 nm), and RFP (560-610 nm). Following measurements, the plate underwent cleaning at the Microplate Reader before being relocated to a designated area for subsequent dilution and measurement cycles. Adjusting the clamping direction of the robotic arms was necessary during the transfer process between the OPCU and the 96-well plate, requiring the use of a self-developed steering device. The bacterial culture in the OPCU was diluted 1:1 by adding 55  $\mu$ L of fresh FAB medium, and the OPCU was then returned to the incubator for consistent incubation over 1 hour before the next dilution cycle. Pipette tips utilized for aspiration were cleaned sequentially with 75% ethanol and ultrapure water. Dilution procedures were conducted

hourly to maintain the bacteria's stable physiological state, ensuring precise characterization of the bacterial frequency response.

## Supplementary Note 10: Quantitative characterization of the FDCC.

Based on the fluorescence intensity of fluorescent proteins measured by the Microplate Washer, we monitor the expression of corresponding promoters within bacteria. Due to the overlapping emission spectra of different fluorescent proteins, it is necessary to first calibrate the cross-talk coefficients between the fluorescence spectra. We diluted three purified fluorescent proteins, sfGFP, CyOFP, and mScarlet, and added them to the microplate. Using the plate reader, we measured the fluorescence intensity of each fluorescent protein in the channels of sfGFP (470-520 nm), CyOFP (488-590 nm), and RFP (560-610 nm) detection modes to calculate the cross-talk coefficients for each fluorescent protein in the other two channels. After correcting for cross-talk, we obtained the true fluorescence values for each fluorescent protein. In the 96-well plate of the OPCU, we set different light conditions, including continuous illumination with fixed intensity (a duty cycle of  $D = 1$ ), unillumination ( $D = 0$ ), and varying duty cycles between 0 and 1 during diverse illumination periods. Six periods were designated (100, 300, 500, 900, 1800, 2400 seconds).

By modifying the promoters and ribosome binding sites (RBS) in front of the genes *vfr* and *cpdA* in the genome, we have constructed a batch of bacterial strains with distinct frequency response characteristics. Strains containing plasmid Plac-*sfGFP*-T0T1-J23102-*CyOFP*-pJN105 were subjected to automated experiments, and optical density ( $OD_{600}$ ) values along with fluorescence intensity values of sfGFP and CyOFP were obtained at different time points. Here, CyOFP served as an internal standard to eliminate errors arising from differences in bacterial quantity and state. Therefore, the output intensity of the FAC system could be calculated by dividing the fluorescence value of sfGFP by the value of CyOFP, which corresponds to the GR ratio in [Supplementary Figure 5d](#). According to the calculation formula for  $Y$  in the analytical solution, we subtracted the GR ratio under a specific duty cycle from the corresponding unillumination condition, and then normalized by dividing the difference between the continuous illumination condition and the unillumination condition to obtain the  $Y$  value. Plotting the curve of  $Y$  against frequency variations and calculating the difference between  $Y_{HF}$  and  $Y_{LF}$  values can be used to evaluate the performance of the FAC system.

## Supplementary Note 11: Theoretical fitting of experimental data.

For different bacterial strains and experimental conditions, the variables we need to fit include the initial concentration of bPAC (representing input light intensity, denoted as  $[bPAC]_0$ ), as well as

the initial concentrations of CpdA ( $[\text{CpdA}]_0$ ) and Vfr ( $[\text{Vfr}]_0$ ), which are determined by the specific strain.

We perform the fitting by minimizing the least squares error between experimental data and MATLAB simulation data using the "lsqcurvefit" function from the MATLAB Optimization Toolbox. The fitting process minimizes the following objective function:  $\min_x \|F(x, xdata) - ydata\|_2^2 = \min_x \sum_i (F(x, xdata_i) - ydata_i)^2$ , where  $xdata$  represents the experimental data, and  $ydata$  represents the MATLAB simulation output. The function  $F(x, xdata)$  is a matrix-valued or vector-valued function of the same size as  $ydata$ . The parameter  $x$  is a vector, where  $x(1) = [\text{bPAC}]_0$ ,  $x(2) = [\text{CpdA}]_0$ ,  $x(3) = [\text{Vfr}]_0$ . The function  $F(x, xdata)$  can be represented as:

$$F(x, xdata) = \begin{bmatrix} F(x, xdata)(1) \\ F(x, xdata)(2) \\ \vdots \\ F(x, xdata)(k) \end{bmatrix}, \text{ and here } k = 3.$$

## Supplementary Note 12: Theoretical analysis of expanding bacterial state space through the FDCC.

Given that Vfr, functioning as a global regulatory factor, controls the expression of multiple target proteins within biological systems, it is imperative to examine how frequency-dependent regulation manifests its effects in this complex regulatory network. The following section provides a comprehensive discussion of these dynamics.

We denote the regulated proteins as  $y_1, y_2, \dots, y_n$ , where the distinguishing feature among these proteins lies in their differential promoter binding affinities to the Vfr-cAMP<sub>2</sub> complex. These distinct binding characteristics are quantified by their respective  $\lambda$  parameters, designated as  $\lambda_1, \lambda_2, \dots, \lambda_n$ . Without loss of generality, we adopt the convention that the subscript indices correspond to an ascending order of  $\lambda$  values, i.e.,  $\lambda_1 < \lambda_2 < \dots < \lambda_n$ . This hierarchical arrangement of  $\lambda$  parameters inherently results in a corresponding ordering of protein expression levels, establishing the relationship  $y_1 < y_2 < \dots < y_n$  under identical regulatory conditions. To facilitate comprehension and analytical tractability, we initiate our investigation by examining a simplified case where two proteins are under regulatory control.

### Supplementary Note 12.1: Regulation via Dutycycle Modulation.

Our initial analysis focuses on the effects of pure amplitude control. The amplitude regulation is implemented through modulation of the duty cycle  $D$ , which induces differential expression levels of  $y_1$  and  $y_2$ . To represent this regulatory mechanism geometrically, we introduce a parametric curve  $L_2(D)$

in the two-dimensional protein expression space, with the subscript 2 indicating the dimensionality of the system. Specifically,  $L_2(D) = (y_1(D), y_2(D))$ .

In this two-dimensional coordinate system, the trajectory of the parametric curve  $L_2(D)$  geometrically represents the manifold of attainable expression levels for the two regulated proteins, with each point on the curve corresponding to a specific regulatory state.

To convert the infinite number of points along the parametric curve into a finite set of discrete states, we employ a discretization parameter  $\epsilon$ , as previously described in the main text. This parameter, which corresponds to the relative noise level in protein expression, effectively transforms the continuous expression space into a countable set of distinguishable regulatory states. For instance, setting  $\epsilon = 0.1$  discretizes the two-dimensional expression space into a  $10 \times 10$  lattice, with each grid cell corresponding to a unique and experimentally distinguishable expression state in the regulatory system. The total number of accessible regulatory states through amplitude control is quantified by counting the distinct cells traversed by the parametric curve  $L_2(D)$ . This phenomenon is clearly visualized in Fig. 4b, where the parametric curve exhibits the described characteristics.

Let  $l_2$  denote the number of distinct grid cells traversed by the parametric curve in the two-dimensional expression space. The numerical results illustrated in the figure yield  $l_2 = 19$ , quantifying the number of distinguishable protein expression states accessible through duty cycle regulation. It is worth noting that in our numerical simulations, to guarantee that the parametric curve  $L_2(D)$  reaches the point (1,1) in the expression space, we employ relatively large values for both the activation coefficient  $\alpha$  and the binding affinity parameters  $\lambda$ .

## **Supplementary Note 12.2: Additional Control via Frequency Modulation.**

A key characteristic of our experimental framework lies in the implementation of frequency-controlled genetic circuits. The introduction of frequency modulation as an additional control parameter, complementing duty cycle regulation, transforms the parametric curve into a surface in the two-dimensional expression space. This parameter-controlled surface, denoted as  $S_2(D, f)$  where the subscript 2 indicates dimensionality, is defined by:  $S_2(D, f) = (y_1(D, f), y_2(D, f))$ .

Under the specified parameter conditions, the geometry of this parametric surface is depicted in the Figure 4b. We denote the number of distinct grid cells intersected by this surface as  $s_2$ , which numerical analysis reveals to be 38.

The graphical representation reveals that the parametric surface  $S_2(D, f)$  is bounded by two prominent curves: a curvilinear boundary forming an arc, and a linear boundary along the diagonal. Given that the parametric surface arises from the incorporation of frequency modulation, we proceed to examine these two boundary curves through the lens of frequency-dependent regulation.

369 Drawing from our prior analysis of asymptotic behavior, when the modulation frequency  $f$  tends  
 370 to zero, we have demonstrated that:  $\lim_{f \rightarrow 0} \bar{y} = \frac{\theta}{1 + \theta} D$ . Given that  $\theta \gg 1$ ,  $\lim_{f \rightarrow 0} \bar{y} \approx D$ . These findings  
 371 reveal that in the zero-frequency limit, the expression levels  $y_1$  and  $y_2$  exhibit identical values, where  
 372 their magnitudes are no longer influenced by the binding affinity parameter  $\lambda$  but are instead uniquely  
 373 determined by the duty cycle  $D$ , such that  $y_1 = y_2 = D$ . This theoretical result explains the emergence  
 374 of the diagonal boundary manifested in the parametric surface.

375 On the other hand, according to our previous asymptotic analysis, in the high-frequency limit,  
 376 the following relationship holds:  $\lim_{f \rightarrow \infty} \bar{y} = \frac{\theta}{\theta + 1} \left( \frac{\theta D^2 (1 - D)}{1 + \theta D^2} - \frac{D(1 - D)}{1 + \theta D^2} + D \right) \approx \frac{D^2 + \theta D^2}{1 + \theta D^2}$ . Conse-  
 377 quently, the second boundary curve is defined by the parametric trajectory  $\left( \frac{D^2 + \theta_1 D^2}{1 + \theta_1 D^2}, \frac{D^2 + \theta_2 D^2}{1 + \theta_2 D^2} \right)$ .  
 378 Our findings demonstrate that the spatial configuration of this parametric curve is governed by the  
 379 parameters  $\theta_1$  and  $\theta_2$ , which directly relate to the binding affinities  $\lambda_1$  and  $\lambda_2$ . A significant observa-  
 380 tion is that increasing the differential between  $\lambda_2$  and  $\lambda_1$  causes the curve to asymptotically approach  
 381 the piecewise linear path defined by the sequential vertices  $(0,0)$ ,  $(0,1)$ , and  $(1,1)$ .

### 382 **Supplementary Note 12.3: $n$ -Dimensional Analysis.**

383 Having examined the regulatory outcomes of duty cycle and frequency modulation in a two-  
 384 protein system, we now proceed to investigate the implications of expanding the number of regulated  
 385 proteins. In the context of  $n$  regulated proteins, let  $L_n(D)$  represent the parametric curve generated  
 386 exclusively by duty cycle control, which maps to an  $n$ -dimensional expression space according to the  
 387 following relationship:  $L_n(D) = (y_1(D), y_2(D), \dots, y_n(D))$ .

388 The number of distinct grid cells traversed by this parametric curve in the  $n$ -dimensional  
 389 expression space is denoted as  $l_n$ , quantifying the discrete states accessible through duty cycle mod-  
 390 ulation. Analogously, let  $S_n(D, f)$  represent the  $n$ -dimensional parametric surface that emerges when  
 391 frequency regulation is introduced, satisfying:  $S_n(D, f) = (y_1(D, f), y_2(D, f), \dots, y_n(D, f))$ . Corre-  
 392 spondingly, let  $s_n$  represent the count of distinct grid cells covered by the  $n$ -dimensional parametric  
 393 surface  $S_n(D, f)$ .

394 While our primary aim is to investigate how  $l_n$  and  $s_n$  scale with increasing regulatory dimen-  
 395 sionality (namely, the number of regulated proteins), a preliminary examination of other parameters'  
 396 effects is warranted. In particular, the occupation number of  $n$ -dimensional grid cells by the paramet-  
 397 ric curve or surface is manifestly dependent on two other essential parameters: the binding affinity  
 398  $\lambda$  and the grid resolution  $\epsilon$ . Alternatively, defining  $r_n = \frac{s_n}{l_n}$  as the multiplicative factor by which  
 399 frequency modulation expands the occupied grid space, we can represent it as:  $r_n = F_1(\lambda) F_2(\epsilon) F_3(n)$ .

400 The terms  $F_1$ ,  $F_2$ , and  $F_3$  appearing in this equation are functional components whose values are  
401 determined by three parameters: the binding affinity coefficient  $\lambda$ , the discretization parameter  $\epsilon$ , and  
402 the regulatory dimension  $n$ . The bold typeface in  $\lambda$  indicates a vector quantity  $(\lambda_1, \lambda_2, \dots, \lambda_3)$ , where  
403 each component represents the binding affinity parameter of a distinct regulated protein.

404 Following the same reasoning as in our two-dimensional analysis, we observe that in the  $n$ -  
405 dimensional case, the relative magnitudes of binding affinities  $\lambda$  determine the geometric configuration  
406 of a boundary curve on the parametric surface. Specifically, as the difference among the  $\lambda$  values  
407 increases, this boundary curve exhibits a stronger tendency to converge toward a piecewise linear  
408 structure. The influence of the grid resolution parameter  $\epsilon$  manifests through distinct power-law rela-  
409 tionships: for the parametric curve, the number of occupied states scales inversely with  $\epsilon$  ( $l_n \propto \epsilon^{-1}$ ),  
410 whereas the parametric surface demonstrates a stronger inverse square dependence ( $s_n \propto \epsilon^{-2}$ ).

411 As our central focus is on examining the dependence on regulatory dimension  $n$ , we conducted our  
412 numerical simulations with predetermined values of binding affinities  $\lambda$  and discretization parameter  $\epsilon$ .  
413 In our numerical analysis implemented in MATLAB, we quantified the dimensional scaling of occupied  
414 states using a geometric sequence of binding affinities  $(\lambda_1, \lambda_2, \dots, \lambda_n) = (50, 50 \times 2^{2^{-1}}, \dots, 50 \times$   
415  $2^{n-1})$  and a fixed discretization parameter  $\epsilon = 0.1$ . The resulting dependence of grid cell number on  
416 regulatory dimension  $n$  is illustrated in the [Supplementary Figure. 6](#).

417 This result reveals a fundamental principle: when frequency-based regulation is introduced, the  
418 capacity for expanding the repertoire of gene expression states scales proportionally with the regula-  
419 tory dimension, implying that larger gene network can achieve proportionally greater combinatorial  
420 diversity through frequency modulation. This property demonstrates a key biological implication of  
421 our frequency-to-amplitude conversion mechanism, establishing its fundamental role in enhancing the  
422 complexity and flexibility of gene regulatory networks.

### 423 **Supplementary Note 13: Screening and characterization of** 424 **cAMP-responsive promoters.**

425 To screen for cAMP-responsive promoters, we selected 243 promoters regulated by the CRP-cAMP  
426 complex in *E. coli*. These promoters were then tested in the FAC03 to assess their responsiveness to  
427 regulation by the Vfr-cAMP<sub>2</sub> complex. Employing a 96-well optogenetic device (OPCU), we induced  
428 cAMP synthesis and utilized the native gene circuit for the Vfr transcription factor in *P. aeruginosa*  
429 wild type. Changes in bacterial fluorescence intensity were captured through microscopy. Promoter  
430 responsiveness was evaluated based on the ratio of fluorescence intensity between mScarlet and GFP.

431 By comparing the ratio after 10 hours of blue light exposure to the ratio at 0 hours, we conducted  
432 the preliminary screening to identify cAMP-responsive promoters ([Supplementary Figure. 6](#)).

433 Through initial screening, we identified 68 positive responsive promoters, which were then electro-  
434 porated into the chassis cells FAC01V34C17B17. Subsequently, cAMP synthesis was induced using  
435 blue light, and automated experiments were conducted to further test dose-response curves under  
436 different light intensities, leading to the selection of 17 backup promoters. To further quantitatively  
437 characterize the frequency response curves of these promoters, a series of plasmids, Pro-*sfGFP*-  
438 J23102-*CyOFP*-pJN105, were constructed using the initially screened promoters. These plasmids  
439 were then electroporated into the chassis cells FAC03C17V17-NP, known for their excellent frequency  
440 response capabilities. The strains were tested under varying duty cycles and periods to evaluate the  
441 promoter response curves, and the sequences corresponding to the selected promoters can be found  
442 in [Supplementary Table 8](#).

#### 443 **Supplementary Note 14: Designing experiments to verify the expansion of** 444 **FAC in the bacterial gene expression space.**

445 Based on the previously selected promoters with different frequency response characteristics, we  
446 linked them to various fluorescent proteins such as sfGFP, CyOFP, and mScarlet. These fragments  
447 were inserted into the genome of FAC03C17V17-NP or into plasmids. Initially, the nupGP-*sfGFP*  
448 fragment was inserted between the *PA3781* and *PA3782* genes in the genome, resulting in the  
449 strain named AutoRGB. Subsequently, we fused the nanAp promoter with mScarlet, construct-  
450 ing the plasmid nanAp-*mScarlet*-J23102-*CyOFP*-pJN105, which was then transformed into the  
451 FAC03V17V17-NP strain. This plasmid was further transformed into AutoRGB to create strain  
452 AutoRGB9. This strain allowed us to monitor the expression levels of nupGp on the genome and  
453 nanAp on the plasmid using sfGFP and mScarlet, respectively.

454 By calculating the ratios of sfGFP to CyOFP and the ratio of mScarlet to CyOFP, we obtained  
455 normalized outputs  $Y_{\text{nupGp}}$  and  $Y_{\text{nanAp}}$ . Then, we investigated how  $Y_{\text{nupGp}}$  varies with  $Y_{\text{nanAp}}$  under  
456 changing light intensities for a duty cycle of 1 and under different periods for fixed duty cycles ( $D =$   
457 0.01, 0.03, 0.06, 0.1, 0.3, 0.5), thereby depicting the two-dimensional space of bacterial states. Based on  
458 the analysis method in Note 12, the state intervals of duty cycle regulation and the state spaces  
459 of frequency regulation were depicted in the state space of Vfr regulation for the expression of two  
460 genes. Combined with the data fitting method in Note 11, the  $\lambda$  values of the two promoters nupGp  
461 and nanAp are 93 and 39 respectively. The results are presented in Fig. 4e. By introducing frequency

462 signals, the FAC system can effectively extend the spatial state, which is consistent with the theoretical  
463 results.

464 The J23102 promoter in front of *CyOFP* was replaced with the cAMP-regulated Plac promoter,  
465 leading to the creation of strain AutoRGB6. We quantitatively characterized the fluorescence inten-  
466 sity values of the three fluorescent proteins under different period duty cycles and corrected them with  
467 the corresponding values of OD<sub>600</sub>. Subsequently, we normalized these values to obtain the expres-  
468 sion protein  $Y$  values of the promoters, thereby depicting the three-dimensional space of bacterial  
469 states. Through automated experimental platforms, we conducted extensive input-response experi-  
470 ments under various conditions, including continuous illumination with varying light intensities and  
471 periodic illumination with different duty cycles.

472 The fluorescence data collected for sfGFP, CyOFP, and mScarlet were normalized and used to  
473 calculate the corresponding promoter outputs  $Y$ . It was observed that they distributed on a plane  
474 despite experimental noise, as shown in Fig. 4f, consistent with theoretical predictions. Subsequently,  
475 we fitted a polynomial surface to the experimental data using MATLAB. The boundaries of this  
476 parametric surface were defined by the maximum fluorescence values under continuous illumination  
477 and the minimum fluorescence values at different frequencies under periodic illumination. For visual-  
478 ization in Fig. 4f, we assigned a gradient of blue hues to the continuous illumination boundary curve  
479 and another gradient color scheme to the minimum values of different frequencies under periodic  
480 illumination. By simulating trajectories of frequency variations at constant duty cycles, the coloring  
481 scheme reflects both the relative position to the boundaries and the evolution patterns of different  
482 frequencies and duty cycles.

## Section 2: Supplementary Figures

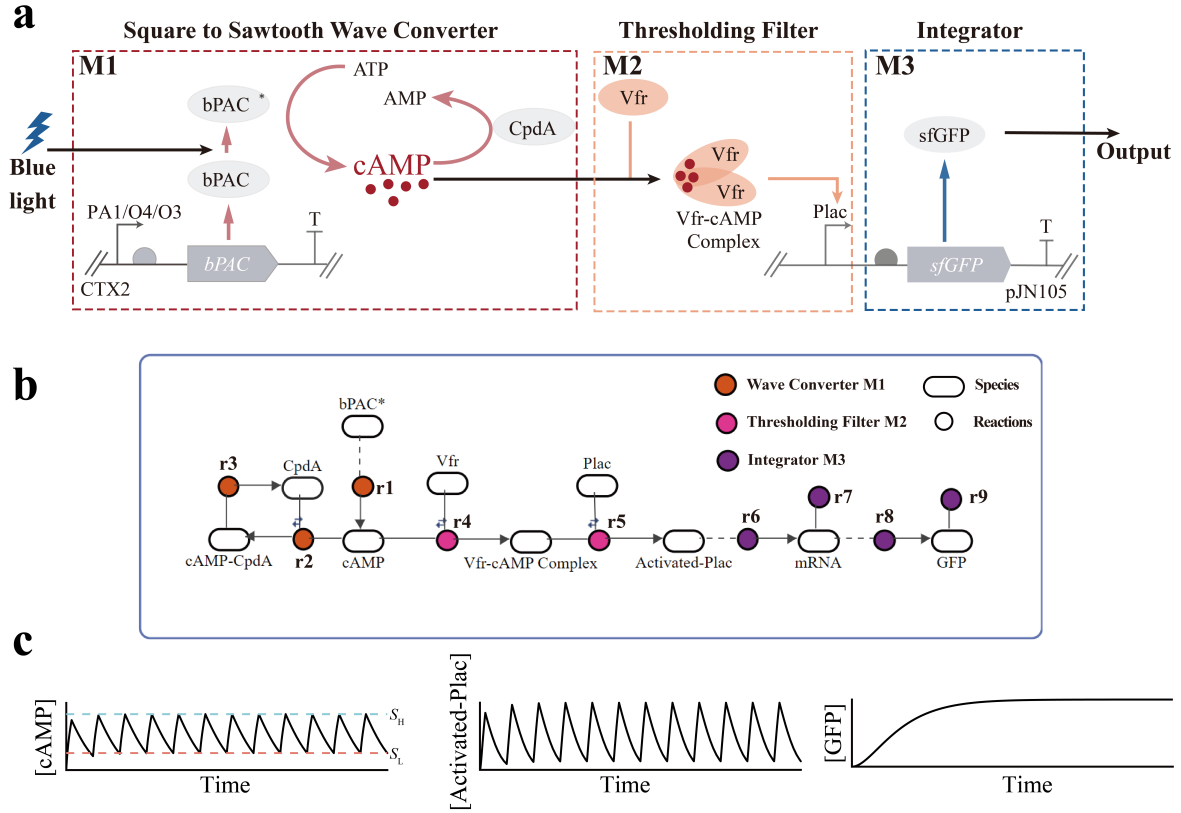

**Supplementary Figure 1. The Chemical Reaction Network (CRN) model and simulation results corresponding to the FDCC.** (a) Molecular implementation of the Frequency-Decoding cAMP Circuit (FDCC). Optogenetic circuit design incorporating light-activated bPAC and CpdA phosphodiesterase (M1), cAMP-dependent Vfr transcription factor binding (M2), and protein expression machinery (M3). (b) The simplified CRN model utilized for simulation. The ellipses represent species in the FDCC, while the circles represent reactions. The orange, pink, and purple circles correspond to the kinetic reactions within modules Wave Converter (M1), Thresholding Filter (M2), and Integrator (M3), respectively. (c) According to the CRN model in the diagram (b), simulate the curves showing the concentrations of cAMP after passing through M1, activated DNA after passing through M2, and GFP after passing through M3, under a square wave periodic signal input.

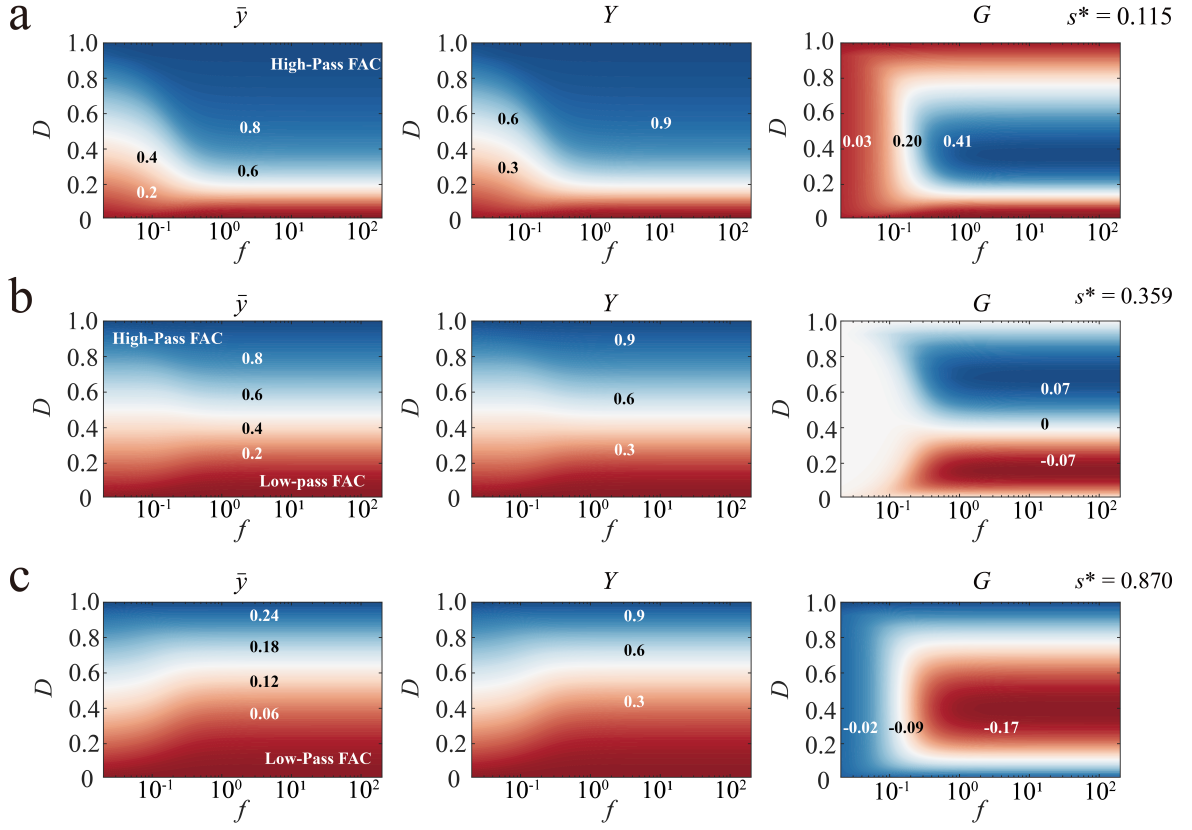

**Supplementary Figure 2. Analysis of Factors Impacting FAC Performance.** Explore the impact of frequency  $f$  and duty cycle  $D$  on the values of  $\bar{y}$  calculated according to [Formula 13](#),  $G$  computed by [Formula 15](#), and  $Y$  obtained from [Formula 14](#) in the main manuscript under varying threshold  $s^*$ . (a) At a threshold of 0.115,  $G$  is positive. Both  $\bar{y}$  and  $Y$  increase with the frequency  $f$  under a constant duty cycle  $D$ , demonstrating a High-Pass FAC. (b) For a threshold of 0.359,  $G$  is positive at high duty cycles and negative at low duty cycles, indicating either a High-Pass FAC or a Low-Pass FAC. (c) With a threshold raised to 0.870,  $G$  becomes negative. Both  $\bar{y}$  and  $Y$  decrease with the frequency  $f$  under a fixed duty cycle, showing a Low-Pass FAC. Moreover, the value of  $\bar{y}$  is notably small.

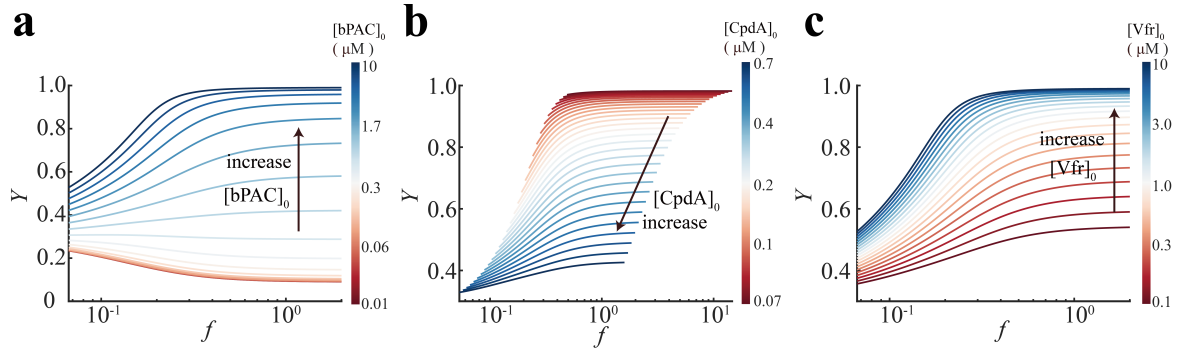

**Supplementary Figure 3. Analytical solutions predict the impact of protein concentration on the performance of the FAC in the FDCC gene circuit.** Explore the impact of protein expression levels of  $[bPAC]_0$ ,  $[CpdA]_0$ ,  $[Vfr]_0$  in the genetic circuit on the FAC performance based on Formulas 6 and 10 in the main manuscript. (a) When  $\lambda$  equals 50 and  $\gamma$  equals 0.005, the output  $Y$  of the FAC system varies with frequency  $f$  as the bPAC concentration increases from 0.01  $\mu$ M to 10  $\mu$ M. (b) The curve of  $Y$  with frequency  $f$  as the CpdA concentration varies, when  $\lambda$  is equal to 50. (c) When  $\gamma$  equals 0.005 and  $\alpha$  equals 1, the curve of  $Y$  varies with frequency  $f$  as the CpdA concentration changes.

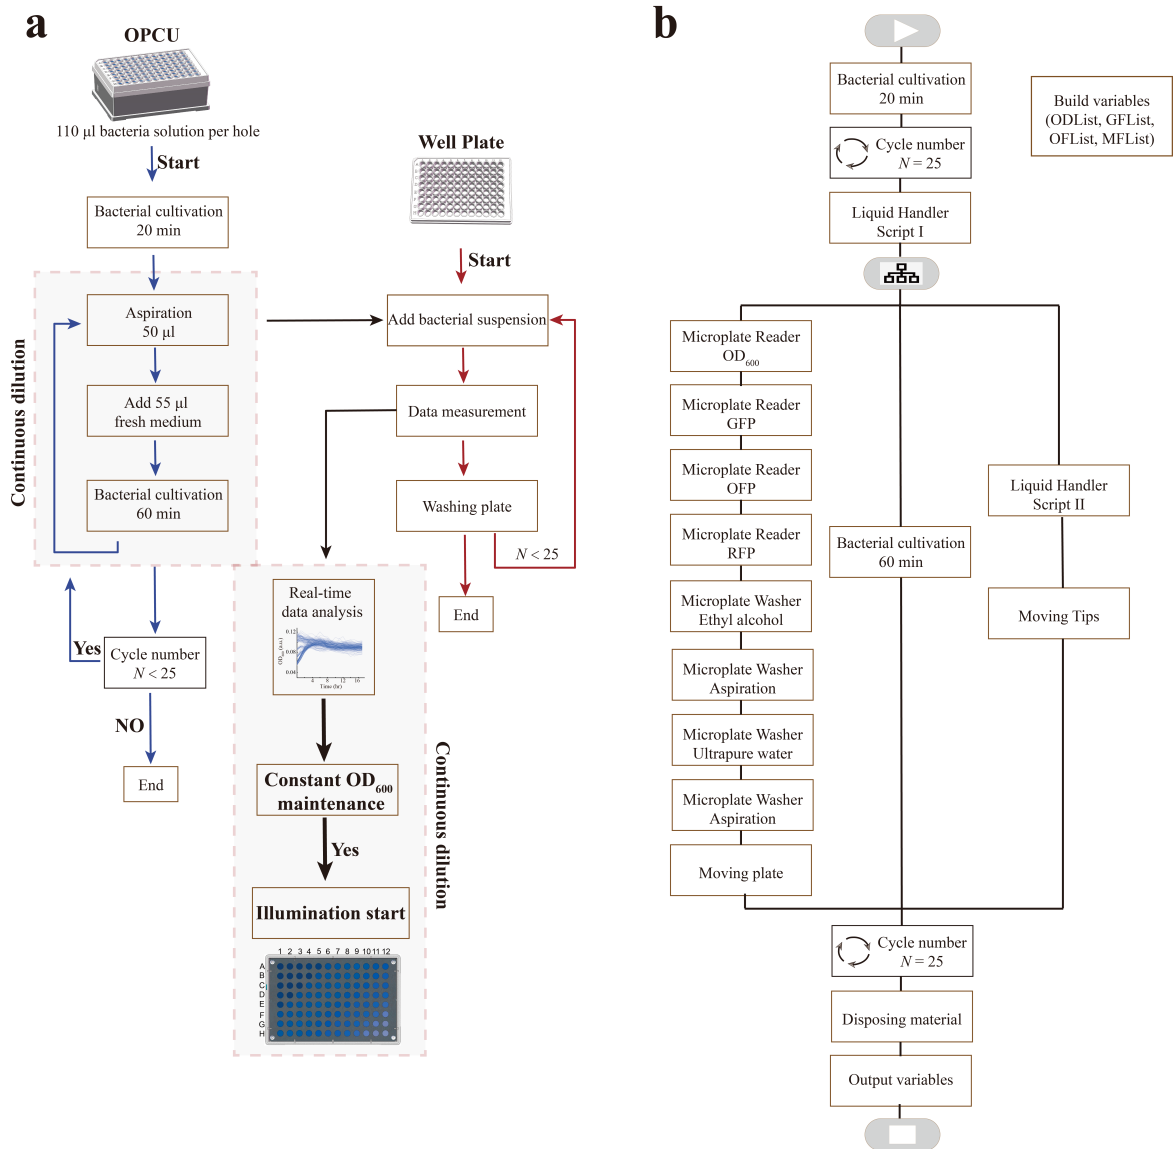

**Supplementary Figure 4. Automated Experimental Workflow and Execution Script.** (a) Schematic diagram of the continuous cultivation process in automated experiments. The blue lines represent the operation path of OPCU, while the red lines depict the operational path of the 96-well plate used for measurements. Bacterial suspension undergoes continuous dilution every hour to maintain a stable bacterial optical density  $OD_{600}$ , ensuring bacteria remain in the logarithmic growth phase for measurement accuracy. During the continuous dilution process, when the  $OD_{600}$  stabilizes at a constant value, initiate illumination. (b) The diagram illustrates the scripting of automated experiments controlling various devices on the automated island in software programming.

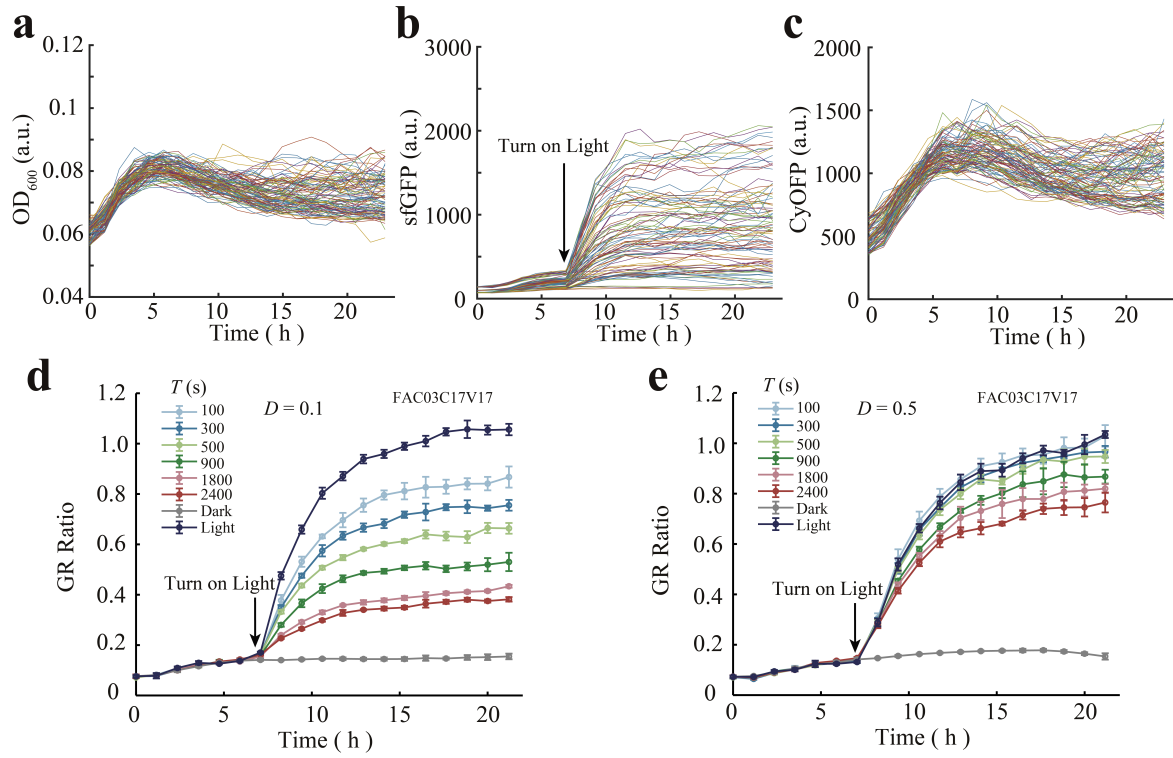

**Supplementary Figure 5. Data Collection and Analysis in Automated Experiments.** The raw values of absorbance OD<sub>600</sub> (a), fluorescence GFP (b), and fluorescence CyOFP (c) intensities collected by the microplatereader in a single automated experiment with FAC03C17V17 strain (containing Plac-*sfGFP*-T0T1-J23102-*CyOFP*-pJN105) strain. Each well of the OPCU can be configured with varying light intensities  $I$ , periods  $P$ , and duty cycles  $D$  to characterize the FAC performance of the bacterial strain. Time-varying curve of the ratio of sfGFP fluorescence induced by the Plac promoter to the internal standard CyOFP fluorescence in the FAC03C17V17 strain when the duty cycle is 0.1 (d) and 0.5 (e) after cross-talk correction. Each curve represents a fixed period (100-300-500-900-1800-2400 seconds). The dark blue line represents the induction curve under continuous light exposure, while the gray line represents the induction curve without light exposure. The arrows in the diagram represent the timing for turning on the illumination. Once the ratios and OD values have stabilized, initiate the illumination with the OPCU. Each experiment was repeated three times, and error bars indicating standard deviation.

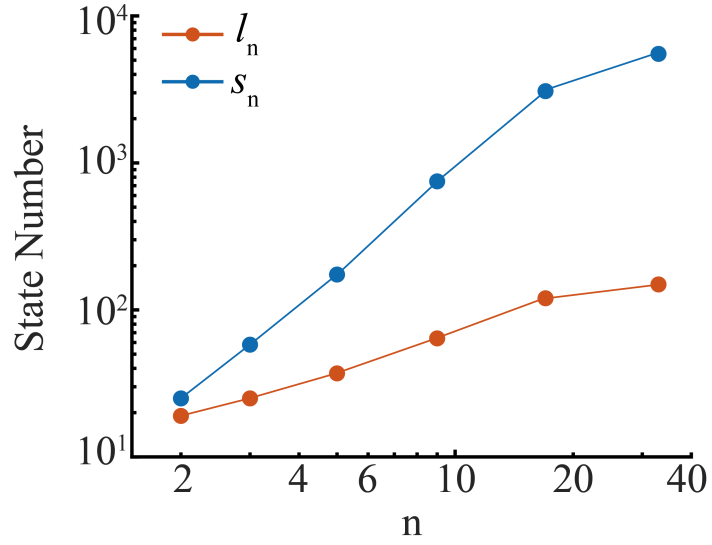

**Supplementary Figure 6. Characterize the relationship between the number of states, information entropy and the regulatory dimensionality using numerical analysis implemented in MATLAB.** (a) Investigate the influence of regulatory dimensionality (specifically, the number of regulated proteins) on  $l_n$  and  $s_n$ . Here,  $l_n$  denotes the number of distinct grid cells crossed by the induction curve, generated by varying the duty cycle, in an  $n$ -dimensional expression space. This quantifies the discrete states attainable through duty cycle modulation.  $s_n$  represents the number of distinct grid cells covered by the  $n$ -dimensional parametric surface obtained by introducing Frequency Modulation. The lambda values for the regulatory proteins corresponding to the promoters are set as  $(\lambda_1, \lambda_2, \dots, \lambda_n) = (50, 50 \times 2^{2^{-1}}, \dots, 50 \times 2^{n-1})$ . Discretization parameter  $\epsilon = 0.1$ . The blue curve illustrates the change of  $s_n$  with  $n$ , whereas the orange curve depicts the variation of  $l_n$  with  $n$ . The difference between  $s_n$  and  $l_n$  widens as  $n$  increases.



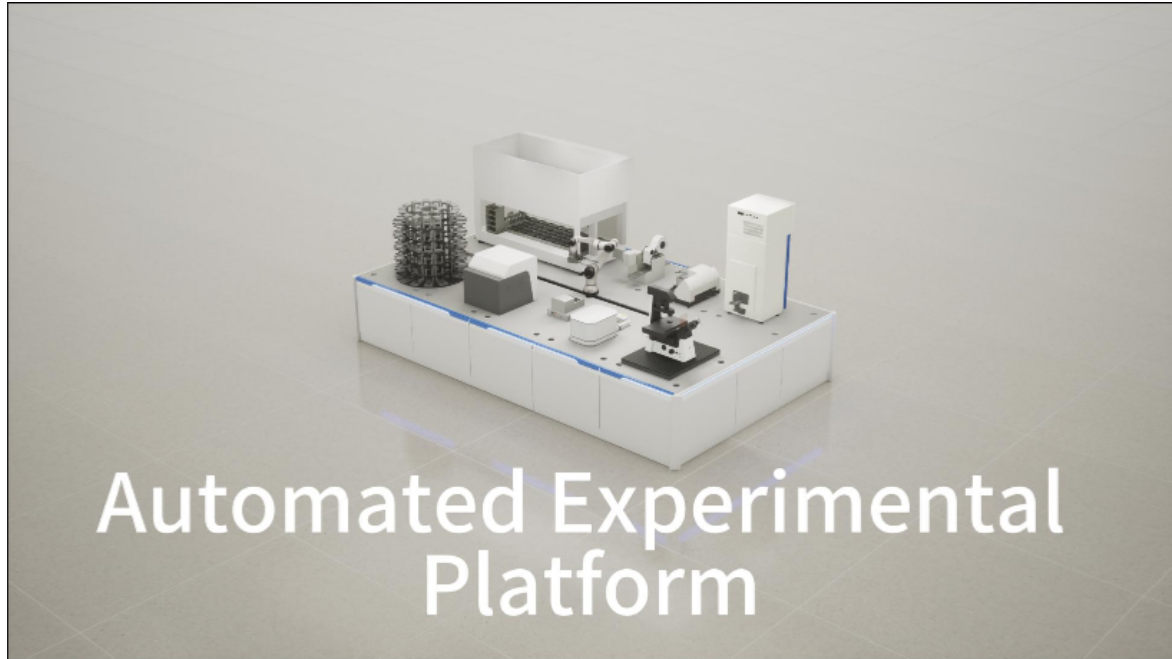

**Supplementary Movie: Workflow of automated experiments.** This video includes bacterial suspension dispensing, setting of illumination parameters, and the operation of automated island.

## Section 3: Supplementary Tables

483 **Supplementary Table.1: Chemical reactions in the CRN model.**

|    |    | Reaction Equation                                                                                    | Description                                        |
|----|----|------------------------------------------------------------------------------------------------------|----------------------------------------------------|
| M1 | r1 | $\text{bPAC}^* \xrightarrow{k_0} \text{bPAC}^* + \text{cAMP}$                                        | Production of cAMP arising from the activated bPAC |
|    | r2 | $\text{cAMP} + \text{CpdA} \xrightleftharpoons[k_f]{k_r} \text{cAMP-CpdA}$                           | Degradation of cAMP arising from CpdA              |
| M2 | r3 | $\text{cAMP-CpdA} \xrightarrow{\gamma} \text{CpdA}$                                                  | Degradation of cAMP arising from CpdA              |
|    | r4 | $\text{cAMP} + \text{cAMP} + \text{Vfr} \xrightleftharpoons[k_{f1}]{k_{r1}} \text{Vfr-cAMP Complex}$ | Formation of cAMP dependent transcription complex  |
|    | r5 | $\text{Vfr-cAMP Complex} + \text{Plac} \xrightleftharpoons[k_{f2}]{k_{r2}} \text{Activated-Plac}$    | Transcription initiation                           |
| M3 | r6 | $\text{Activated-Plac} \xrightarrow{k_1} \text{Activated-Plac} + \text{mRNA}$                        | Transcription of GFP                               |
|    | r7 | $\text{mRNA} \xrightarrow{k_{\text{deg1}}} \text{null}$                                              | mRNA degradation                                   |
|    | r8 | $\text{mRNA} \xrightarrow{k_2} \text{mRNA} + \text{GFP}$                                             | Translation of GFP                                 |
|    | r9 | $\text{GFP} \xrightarrow{k_{\text{deg2}}} \text{null}$                                               | Protein degradation of GFP                         |

484 **Supplementary Table.2: Ordinary Differential Equations (ODEs) in the**  
485 **CRN model.**

| Ordinary Differential Equations |                                                                                                                                                                                              |
|---------------------------------|----------------------------------------------------------------------------------------------------------------------------------------------------------------------------------------------|
| Eq.1                            | $\frac{d[\text{cAMP}]}{dt} = k + k_r[\text{cAMP-CpdA}] + k_{r1}[\text{Vfr-cAMP Complex}] - k_f[\text{cAMP}][\text{CpdA}] - k_{f1}[\text{cAMP}][\text{Vfr}]^2$                                |
| Eq.2                            | $\frac{d[\text{CpdA}]}{dt} = (\alpha + k_r)[\text{cAMP-CpdA}] - k_f[\text{cAMP}][\text{CpdA}]$                                                                                               |
| Eq.3                            | $\frac{d[\text{cAMP-CpdA}]}{dt} = k_f[\text{cAMP}][\text{CpdA}] - (\alpha + k_r)[\text{cAMP-CpdA}]$                                                                                          |
| Eq.4                            | $\frac{d[\text{Vfr}]}{dt} = k_{r1}[\text{Vfr-cAMP Complex}] - k_{f1}[\text{Vfr}][\text{cAMP}]^2$                                                                                             |
| Eq.5                            | $\frac{d[\text{Vfr-cAMP Complex}]}{dt} = k_{f1}[\text{Vfr}][\text{cAMP}]^2 - k_{r1}[\text{Vfr-cAMP Complex}] + k_{r2}[\text{Activated-Plac}] - k_{f2}[\text{Vfr-cAMP Complex}][\text{Plac}]$ |
| Eq.6                            | $\frac{d[\text{Plac}]}{dt} = k_{r2}[\text{Activated-Plac}] - k_{f2}[\text{Vfr-cAMP Complex}][\text{Plac}]$                                                                                   |
| Eq.7                            | $\frac{d[\text{Activated-Plac}]}{dt} = k_{f2}[\text{Vfr-cAMP Complex}][\text{Plac}] - k_{r2}[\text{Activated-Plac}]$                                                                         |
| Eq.8                            | $\frac{d[\text{mRNA}]}{dt} = k_1[\text{Activated-Plac}] - k_{\text{deg1}}[\text{mRNA}]$                                                                                                      |
| Eq.9                            | $\frac{d[\text{GFP}]}{dt} = k_2[\text{mRNA}] - k_{\text{deg2}}[\text{GFP}]$                                                                                                                  |

486 **Supplementary Table.3: Kinetetic parameters in the CRN model.**

| Kinetic Constant | Description                                                                             | Value                | Unit                     | Notes                                |
|------------------|-----------------------------------------------------------------------------------------|----------------------|--------------------------|--------------------------------------|
| $k_0$            | rate of cAMP production from bPAC*                                                      | 0.0045               | $s^{-1}$                 |                                      |
| $k$              | rate of cAMP production from bPAC*, which includes the influence of bPAC* concentration | 0.0045               | $\mu M \cdot s^{-1}$     | $k = k_0[bPAC^*]$                    |
| $k_f$            | binding constant of cAMP and CpdA                                                       | 10                   | $(\mu M \cdot s)^{-1}$   |                                      |
| $k_r$            | dissociation constant of cAMP and CpdA                                                  | 70                   | $s^{-1}$                 |                                      |
| $\gamma$         | rate of degradation of cAMP-CpdA                                                        | 0.069                | $s^{-1}$                 |                                      |
| $k_{f1}$         | binding constant of Vfr and cAMP                                                        | 20                   | $(\mu M^2 \cdot s)^{-1}$ |                                      |
| $k_{r1}$         | dissociation constant of Vfr and cAMP                                                   | 80                   | $s^{-1}$                 | $K_1 = \sqrt{\frac{k_{r1}}{k_{f1}}}$ |
| $k_{f2}$         | binding constant of Vfr-cAMP <sub>2</sub> Complex and Plac                              | 100                  | $(\mu M \cdot s)^{-1}$   |                                      |
| $k_{r2}$         | dissociation constant of Vfr-cAMP <sub>2</sub> Complex and Plac                         | 1                    | $s^{-1}$                 | $K_2 = \frac{k_{r2}}{k_{f2}}$        |
| $k_1$            | rate of transcription of GFP from Activated-Plac                                        | $6 \times 10^{-4}$   | $s^{-1}$                 |                                      |
| $k_2$            | rate of translation of GFP from mRNA                                                    | $3.5 \times 10^{-3}$ | $s^{-1}$                 |                                      |
| $k_{deg1}$       | rate of mRNA degradation                                                                | $5 \times 10^{-3}$   | $s^{-1}$                 |                                      |
| $k_{deg2}$       | rate of GFP degradation                                                                 | $2.7 \times 10^{-4}$ | $s^{-1}$                 |                                      |

487 **Supplementary Table.4: The symbols and their meanings used in this**  
488 **study.**

| Symbols    | Unit                               | Physical Significance                                                                                                                                                                                                                                                                                                       |
|------------|------------------------------------|-----------------------------------------------------------------------------------------------------------------------------------------------------------------------------------------------------------------------------------------------------------------------------------------------------------------------------|
| $k$        | $\mu\text{M} \cdot \text{s}^{-1}$  | Synthetic rate of cAMP mediated by bPAC*                                                                                                                                                                                                                                                                                    |
| $\gamma$   | $\text{s}^{-1}$                    | hydrolysis rate of cAMP mediated by CpdA                                                                                                                                                                                                                                                                                    |
| $x$        | $\mu\text{M}$                      | concentration of cAMP                                                                                                                                                                                                                                                                                                       |
| $x_1, x_2$ | $\mu\text{M}$                      | concentration of cAMP during the light and dark periods, respectively                                                                                                                                                                                                                                                       |
| $x_H, x_L$ | $\mu\text{M}$                      | initial concentration of cAMP at the beginning of the light or dark period                                                                                                                                                                                                                                                  |
| $t$        | s                                  | time                                                                                                                                                                                                                                                                                                                        |
| $T$        | s                                  | period of square-wave signal                                                                                                                                                                                                                                                                                                |
| $I$        | $\mu\text{W} \cdot \text{cm}^{-2}$ | light intensity                                                                                                                                                                                                                                                                                                             |
| $K_1$      | $\mu\text{M}$                      | The microscopic dissociation constant between cAMP and the transcription factor Vfr represents the affinity of the interaction, with the concentration of cAMP being the ligand concentration required to achieve half-maximal binding of Vfr.                                                                              |
| $K_2$      | $\mu\text{M}$                      | The microscopic dissociation constant for the Vfr-cAMP <sub>2</sub> Complex binding to regulatory promoters reflects the affinity of the complex for these promoters, with the concentration of the Vfr-cAMP <sub>2</sub> Complex being the ligand concentration required to achieve half-maximal binding of the promoters. |
| $D$        | non-dimensional                    | Duty cycle ( $D$ ) is the fraction of one period in which the light is active, defined as $D = \frac{PW}{T}$ , where $PW$ is the active time of the light.                                                                                                                                                                  |
| $\tau$     | non-dimensional                    | Non-dimensional time, defined as $\tau = t\gamma$ .                                                                                                                                                                                                                                                                         |
| $\phi$     | non-dimensional                    | Non-dimensional representation of the light period, defined as $\phi = T\gamma$ .                                                                                                                                                                                                                                           |
| $f$        | non-dimensional                    | Non-dimensional frequency of the period, calculated as $f = \frac{1}{\phi} = \frac{1}{\gamma T}$ .                                                                                                                                                                                                                          |

Continued on next page

| Symbols          | Unit            | Physical Significance                                                                                                                                                                                                                                                                                                                                                                                                                                                         |
|------------------|-----------------|-------------------------------------------------------------------------------------------------------------------------------------------------------------------------------------------------------------------------------------------------------------------------------------------------------------------------------------------------------------------------------------------------------------------------------------------------------------------------------|
| $s(s_1, s_2)$    | non-dimensional | The non-dimensional representation of cAMP concentration is defined as $s = x/\frac{k}{\gamma}$ , where $\frac{k}{\gamma}$ represents the theoretical maximum concentration of cAMP.                                                                                                                                                                                                                                                                                          |
| $s_H, s_L$       | non-dimensional | Highest and lowest non-dimensional concentrations of cAMP in one period.                                                                                                                                                                                                                                                                                                                                                                                                      |
| $\alpha$         | non-dimensional | Parameter representing light intensity, defined as $\alpha = \frac{k}{\gamma K_1}$ .                                                                                                                                                                                                                                                                                                                                                                                          |
| $\lambda$        | non-dimensional | Non-dimensional parameter representing the relative abundance of transcription factor Vfr, defined as $\lambda = \frac{[Vfr]_0}{K_2}$ .                                                                                                                                                                                                                                                                                                                                       |
| $\theta$         | non-dimensional | Defined parameter for equation simplification, defined as $\theta = \lambda\alpha^2$ .                                                                                                                                                                                                                                                                                                                                                                                        |
| $\psi$           | non-dimensional | Fraction of activated promoters, calculated as: $\psi = \frac{1}{1 + \frac{1}{\lambda}(1 + \frac{1}{\alpha^2 s^2})}$                                                                                                                                                                                                                                                                                                                                                          |
| $\bar{y}$        | non-dimensional | Steady-state average non-dimensional GFP concentration over one period, defined as: $\bar{y} = f \int_0^{1/f} \psi(\tau) d\tau$                                                                                                                                                                                                                                                                                                                                               |
| $y^*$            | non-dimensional | Steady-state average GFP concentration over one constant light period, defined as: $y^* = \bar{y}(D = 1)$                                                                                                                                                                                                                                                                                                                                                                     |
| $s^*$            | non-dimensional | Threshold of M2 filter, representing the non-dimensional concentration of cAMP, is defined as: $s^* = s(\psi'' = 0)$                                                                                                                                                                                                                                                                                                                                                          |
| $Y$              | non-dimensional | Non-dimensional representation of protein concentration, defined as: $Y = \frac{\bar{y}}{y^*}$                                                                                                                                                                                                                                                                                                                                                                                |
| $Y_{HF}, Y_{LF}$ | non-dimensional | The non-dimensional representation of protein concentration, as the non-dimensionalized frequency $f$ approaches its theoretical limits, is defined $Y_{HF} = \lim_{f \rightarrow \infty} Y$ by for high-frequency conditions and $Y_{LF} = \lim_{f \rightarrow 0} Y$ for low-frequency condition. At experimental conditions, frequency is usually between $1/100 \text{ s}^{-1}$ and $1/2400 \text{ s}^{-1}$ , which is constrained by the period of strain division cycle. |

Continued on next page

| Symbols | Unit            | Physical Significance                                                                                                                                                                                                                                                                                                                                                         |
|---------|-----------------|-------------------------------------------------------------------------------------------------------------------------------------------------------------------------------------------------------------------------------------------------------------------------------------------------------------------------------------------------------------------------------|
| $G$     | non-dimensional | <p>Non-dimensional representation of frequency influence on the protein output, defined as:</p> $G = f \left[ \ln \left( \sqrt{\frac{1 + (\frac{s_H}{\sqrt{3}s^*})^2}{1 + (\frac{s_L}{\sqrt{3}s^*})^2}} \right) - \sqrt{3}s^* \left( \tan^{-1} \frac{\frac{s_H}{\sqrt{3}s^*} - \frac{s_L}{\sqrt{3}s^*}}{1 + \frac{s_H}{\sqrt{3}s^*} \frac{s_L}{\sqrt{3}s^*}} \right) \right]$ |

489 **Supplementary Table.5: The effect of experimental control parameters on**  
490 **the characteristics of FAC.**

| Tunable Parameters                         |                   | Description                               | Corresponding Parameters |                                                                                      |
|--------------------------------------------|-------------------|-------------------------------------------|--------------------------|--------------------------------------------------------------------------------------|
| Signal<br>input<br>parameters              | $I$               | Light intensity                           | $\alpha$                 | $\alpha = \frac{k}{\gamma K_1}$                                                      |
|                                            | $T$               | Period of square-wave signal              | $f$                      | $f = \frac{1}{\phi} = \frac{1}{\gamma T}$                                            |
|                                            | $D$               | Duty cycle of square-wave signal          | $D, s_H, s_L$            | $s_H = \frac{1-e^{-\phi D}}{1-e^{-\phi}}$<br>$s_L = \frac{e^{\phi D}-1}{e^{\phi}-1}$ |
| System<br>parameters<br>in gene<br>circuit | $[\text{bPAC}]_0$ | the initial concentration of bPAC protein | $\alpha$                 |                                                                                      |
|                                            | $[\text{CpdA}]_0$ | the initial concentration of CpdA protein | $s_H, s_L, f, \alpha$    |                                                                                      |
|                                            | $[\text{Vfr}]_0$  | the initial concentration of Vfr protein  | $\lambda, f, s_H, s_L$   | $\lambda = \frac{[\text{Vfr}]_0}{K_2}$                                               |

491 **Supplementary Table.6: Bacterial strains used in this study.**

| <i>P.aeruginosa</i> strains | Description                                                                                                                                                                                                               | Source     |
|-----------------------------|---------------------------------------------------------------------------------------------------------------------------------------------------------------------------------------------------------------------------|------------|
| FAC01                       | Knockout six gens ( <i>exoS</i> , <i>exoT</i> , <i>pslBCD</i> , <i>pelA</i> , <i>cyaA</i> and <i>cyaB</i> ) in wild-type strain PAO1.                                                                                     | This study |
| FAC03                       | FAC01, Genomic insertion of <i>bPAC</i> fragment using plasmid PA1/O4/O3- <i>bPAC</i> -CTX2.                                                                                                                              | This study |
| FAC03C04V04                 | FAC03, the promoters and RBS of <i>vfr</i> and <i>cpdA</i> on the genome have been replaced with J23102-RBS004 and J23100-RBS004, respectively. Containing plasmid Plac- <i>sfGFP</i> -T0T1-J23102- <i>CyOFP</i> -pJN105. | This study |
| FAC03C04V17                 | FAC03, the promoters and RBS of <i>vfr</i> and <i>cpdA</i> on the genome have been replaced with J23102-RBS017 and J23100-RBS004, respectively. Containing plasmid Plac- <i>sfGFP</i> -T0T1-J23102- <i>CyOFP</i> -pJN105. | This study |
| FAC03C17V34                 | FAC03, the promoters and RBS of <i>vfr</i> and <i>cpdA</i> on the genome have been replaced with J23102-B0034 and J23100-RBS017, respectively. Containing plasmid Plac- <i>sfGFP</i> -T0T1-J23102- <i>CyOFP</i> -pJN105.  | This study |
| FAC03C17V46                 | FAC03, the promoters and RBS of <i>vfr</i> and <i>cpdA</i> on the genome have been replaced with J23102-RBS046 and J23100-RBS017, respectively. Containing plasmid Plac- <i>sfGFP</i> -T0T1-J23102- <i>CyOFP</i> -pJN105. | This study |
| FAC03C17V17                 | FAC03, the promoters and RBS of <i>vfr</i> and <i>cpdA</i> on the genome have been replaced with J23102-RBS017 and J23100-RBS017, respectively. Containing plasmid Plac- <i>sfGFP</i> -T0T1-J23102- <i>CyOFP</i> -pJN105. | This study |
| FAC03C21V34                 | FAC03, the promoters and RBS of <i>vfr</i> and <i>cpdA</i> on the genome have been replaced with J23102-B0034 and J23100-RBS021, respectively. Containing plasmid Plac- <i>sfGFP</i> -T0T1-J23102- <i>CyOFP</i> -pJN105.  | This study |

Continued on next page

| <i>P.aeruginosa</i> strains | Description                                                                                                                                                                                                                                                                                     | Source     |
|-----------------------------|-------------------------------------------------------------------------------------------------------------------------------------------------------------------------------------------------------------------------------------------------------------------------------------------------|------------|
| FAC01C17V34B17              | FAC01, the promoters and RBS of <i>vfr</i> and <i>cpdA</i> on the genome have been replaced with J23102-B0034 and J23100-RBS017, respectively. Genomic insertion of bPAC fragment using plasmid PA1-RBS017-bPAC-CTX2. Containing plasmid Plac- <i>sfGFP</i> -T0T1-J23102- <i>CyOFP</i> -pJN105. | This study |
| FAC03C02V34                 | FAC03, the promoters and RBS of <i>vfr</i> and <i>cpdA</i> on the genome have been replaced with J23102-B0034 and J23100-RBS002, respectively. Containing plasmid Plac- <i>sfGFP</i> -T0T1-J23102- <i>CyOFP</i> -pJN105.                                                                        | This study |
| FAC03C10V34                 | FAC03, the promoters and RBS of <i>vfr</i> and <i>cpdA</i> on the genome have been replaced with J23102-B0034 and J23100-RBS010, respectively. Containing plasmid Plac- <i>sfGFP</i> -T0T1-J23102- <i>CyOFP</i> -pJN105.                                                                        | This study |
| FAC03C14V34                 | FAC03, the promoters and RBS of <i>vfr</i> and <i>cpdA</i> on the genome have been replaced with J23102-B0034 and J23100-RBS014, respectively. Containing plasmid Plac- <i>sfGFP</i> -T0T1-J23102- <i>CyOFP</i> -pJN105.                                                                        | This study |
| FAC03C16V34                 | FAC03, the promoters and RBS of <i>vfr</i> and <i>cpdA</i> on the genome have been replaced with J23102-B0034 and J23100-RBS016, respectively. Containing plasmid Plac- <i>sfGFP</i> -T0T1-J23102- <i>CyOFP</i> -pJN105.                                                                        | This study |
| FAC03C20V34                 | FAC03, the promoters and RBS of <i>vfr</i> and <i>cpdA</i> on the genome have been replaced with J23102-B0034 and J23100-RBS020, respectively. Containing plasmid Plac- <i>sfGFP</i> -T0T1-J23102- <i>CyOFP</i> -pJN105.                                                                        | This study |
| FAC03C22V34                 | FAC03, the promoters and RBS of <i>vfr</i> and <i>cpdA</i> on the genome have been replaced with J23102-B0034 and J23100-RBS022, respectively. Containing plasmid Plac- <i>sfGFP</i> -T0T1-J23102- <i>CyOFP</i> -pJN105.                                                                        | This study |

Continued on next page

| <i>P.aeruginosa</i> strains | Description                                                                                                                                                                                                               | Source     |
|-----------------------------|---------------------------------------------------------------------------------------------------------------------------------------------------------------------------------------------------------------------------|------------|
| FAC03C02V17                 | FAC03, the promoters and RBS of <i>vfr</i> and <i>cpdA</i> on the genome have been replaced with J23102-RBS017 and J23100-RBS002, respectively. Containing plasmid Plac- <i>sfGFP</i> -T0T1-J23102- <i>CyOFP</i> -pJN105. | This study |
| FAC03C10V17                 | FAC03, the promoters and RBS of <i>vfr</i> and <i>cpdA</i> on the genome have been replaced with J23102-RBS017 and J23100-RBS010, respectively. Containing plasmid Plac- <i>sfGFP</i> -T0T1-J23102- <i>CyOFP</i> -pJN105. | This study |
| FAC03C14V17                 | FAC03, the promoters and RBS of <i>vfr</i> and <i>cpdA</i> on the genome have been replaced with J23102-RBS017 and J23100-RBS014, respectively. Containing plasmid Plac- <i>sfGFP</i> -T0T1-J23102- <i>CyOFP</i> -pJN105. | This study |
| FAC03C16V17                 | FAC03, the promoters and RBS of <i>vfr</i> and <i>cpdA</i> on the genome have been replaced with J23102-RBS017 and J23100-RBS016, respectively. Containing plasmid Plac- <i>sfGFP</i> -T0T1-J23102- <i>CyOFP</i> -pJN105. | This study |
| FAC03C20V17                 | FAC03, the promoters and RBS of <i>vfr</i> and <i>cpdA</i> on the genome have been replaced with J23102-RBS017 and J23100-RBS020, respectively. Containing plasmid Plac- <i>sfGFP</i> -T0T1-J23102- <i>CyOFP</i> -pJN105. | This study |
| FAC03C22V17                 | FAC03, the promoters and RBS of <i>vfr</i> and <i>cpdA</i> on the genome have been replaced with J23102-RBS017 and J23100-RBS022, respectively. Containing plasmid Plac- <i>sfGFP</i> -T0T1-J23102- <i>CyOFP</i> -pJN105. | This study |
| FAC03C10V04                 | FAC03, the promoters and RBS of <i>vfr</i> and <i>cpdA</i> on the genome have been replaced with J23102-RBS004 and J23100-RBS010, respectively. Containing plasmid Plac- <i>sfGFP</i> -T0T1-J23102- <i>CyOFP</i> -pJN105. | This study |

Continued on next page

| <i>P.aeruginosa</i> strains | Description                                                                                                                                                                                                               | Source     |
|-----------------------------|---------------------------------------------------------------------------------------------------------------------------------------------------------------------------------------------------------------------------|------------|
| FAC03C20V04                 | FAC03, the promoters and RBS of <i>vfr</i> and <i>cpdA</i> on the genome have been replaced with J23102-RBS004 and J23100-RBS020, respectively. Containing plasmid Plac- <i>sfGFP</i> -T0T1-J23102- <i>CyOFP</i> -pJN105. | This study |
| FAC03C23115V04              | FAC03, the promoters and RBS of <i>vfr</i> and <i>cpdA</i> on the genome have been replaced with J23102-RBS004 and J23115-B0034, respectively. Containing plasmid Plac- <i>sfGFP</i> -T0T1-J23102- <i>CyOFP</i> -pJN105.  | This study |
| FAC03C02V04                 | FAC03, the promoters and RBS of <i>vfr</i> and <i>cpdA</i> on the genome have been replaced with J23102-RBS004 and J23100-RBS002, respectively. Containing plasmid Plac- <i>sfGFP</i> -T0T1-J23102- <i>CyOFP</i> -pJN105. | This study |
| FAC03C14V04                 | FAC03, the promoters and RBS of <i>vfr</i> and <i>cpdA</i> on the genome have been replaced with J23102-RBS004 and J23100-RBS014, respectively. Containing plasmid Plac- <i>sfGFP</i> -T0T1-J23102- <i>CyOFP</i> -pJN105. | This study |
| FAC03C22V04                 | FAC03, the promoters and RBS of <i>vfr</i> and <i>cpdA</i> on the genome have been replaced with J23102-RBS004 and J23100-RBS022, respectively. Containing plasmid Plac- <i>sfGFP</i> -T0T1-J23102- <i>CyOFP</i> -pJN105. | This study |
| FAC03C23106V04              | FAC03, the promoters and RBS of <i>vfr</i> and <i>cpdA</i> on the genome have been replaced with J23102-RBS004 and J23106-B0034, respectively. Containing plasmid Plac- <i>sfGFP</i> -T0T1-J23102- <i>CyOFP</i> -pJN105.  | This study |
| FAC03C23106V34              | FAC03, the promoters and RBS of <i>vfr</i> and <i>cpdA</i> on the genome have been replaced with J23102-B0034 and J23106-B0034, respectively. Containing plasmid Plac- <i>sfGFP</i> -T0T1-J23102- <i>CyOFP</i> -pJN105.   | This study |

Continued on next page

| <i>P.aeruginosa</i> strains | Description                                                                                                                                                                                                              | Source      |
|-----------------------------|--------------------------------------------------------------------------------------------------------------------------------------------------------------------------------------------------------------------------|-------------|
| FAC03C23115V34              | FAC03, the promoters and RBS of <i>vfr</i> and <i>cpdA</i> on the genome have been replaced with J23102-B0034 and J23115-B0034, respectively. Containing plasmid Plac- <i>sfGFP</i> -T0T1-J23102- <i>CyOFP</i> -pJN105.  | This study  |
| FAC03C23106V17              | FAC03, the promoters and RBS of <i>vfr</i> and <i>cpdA</i> on the genome have been replaced with J23102-RBS017 and J23106-B0034, respectively. Containing plasmid Plac- <i>sfGFP</i> -T0T1-J23102- <i>CyOFP</i> -pJN105. | This study. |
| FAC03C23115V17              | FAC03, the promoters and RBS of <i>vfr</i> and <i>cpdA</i> on the genome have been replaced with J23102-RBS017 and J23115-B0034, respectively. Containing plasmid Plac- <i>sfGFP</i> -T0T1-J23102- <i>CyOFP</i> -pJN105. | This study. |
| FAC03C17V17-NP              | FAC03, the promoters and RBS of <i>vfr</i> and <i>cpdA</i> on the genome have been replaced with J23102-RBS017 and J23100-RBS017, respectively. Without plasmid Plac- <i>sfGFP</i> -T0T1-J23102- <i>CyOFP</i> -pJN105.   | This study. |
| AutoRGB                     | FAC03C17V17-NP, Genomic insertion of nupGp- <i>sfGFP</i> fragments using plasmid PA3781-nupGp- <i>sfGFP</i> -noBBA-PCRISPR.                                                                                              | This study. |
| AutoRGB-6                   | AutoRGB, containing plasmid nanAp- <i>mScarlet</i> -Plac- <i>CyOFP</i> -pJN105.                                                                                                                                          | This study. |
| AutoRGB-9                   | AutoRGB, containing plasmid nanAp- <i>mScarlet</i> -J23102- <i>CyOFP</i> -pJN105.                                                                                                                                        | This study. |

492 **Supplementary Table.7: Plasmids used in this study.**

| Plasmid                                   | Description                                                                                  | Source                |
|-------------------------------------------|----------------------------------------------------------------------------------------------|-----------------------|
| PCASPA                                    | Plasmid expression Cas9 for chromosomal insertion of deletion. Tet <sup>r</sup>              | <a href="#">ref 1</a> |
| PCRISPR                                   | Plasmid expression gRNA for chromosomal insertion of deletion. Carb <sup>r</sup>             | <a href="#">ref 1</a> |
| PA3781-nupGp- <i>sfGFP</i> -noBBA-PCRISPR | Plasmid used for inserting nupGp-sfGFP fragment into the genome.                             | This study.           |
| PCRISPR- <i>cyaA</i>                      | Plasmid used knock out <i>cyaA</i> . Carb <sup>r</sup>                                       | This study.           |
| PCRISPR- <i>cyaB</i>                      | Plasmid used knock out <i>cyaA</i> . Carb <sup>r</sup>                                       | This study.           |
| PCRISPR- <i>exoS</i>                      | Plasmid used knock out <i>textitexoS</i> . Carb <sup>r</sup>                                 | This study.           |
| PCRISPR- <i>exoT</i>                      | Plasmid used knock out <i>exoT</i> . Carb <sup>r</sup>                                       | This study.           |
| PCRISPR- <i>pslBCD</i>                    | Plasmid used knock out <i>pslBCD</i> . Carb <sup>r</sup>                                     | This study.           |
| PCRISPR- <i>pelA</i>                      | Plasmid used knock out <i>pelA</i> . Carb <sup>r</sup>                                       | This study.           |
| J23102-B0034- <i>vfr</i> -PCRISPR         | Plasmid used for replacing the promoter of <i>vfr</i> with J23102-B0034. Carb <sup>r</sup>   | This study.           |
| J23102-RBS046- <i>vfr</i> -PCRISPR        | Plasmid used for replacing the promoter of <i>vfr</i> with J23102-RBS046. Carb <sup>r</sup>  | This study.           |
| J23102-RBS004- <i>vfr</i> -PCRISPR        | Plasmid used for replacing the promoter of <i>vfr</i> with J23102-RBS004. Carb <sup>r</sup>  | This study.           |
| J23102-RBS017- <i>vfr</i> -PCRISPR        | Plasmid used for replacing the promoter of <i>vfr</i> with J23102-RBS017. Carb <sup>r</sup>  | This study.           |
| J23102-B0034- <i>cpdA</i> -PCRISPR        | Plasmid used for replacing the promoter of <i>cpdA</i> with J23102-B0034. Carb <sup>r</sup>  | This study.           |
| J23102-RBS046- <i>cpdA</i> -PCRISPR       | Plasmid used for replacing the promoter of <i>cpdA</i> with J23102-RBS046. Carb <sup>r</sup> | This study.           |
| J23102-RBS004- <i>cpdA</i> -PCRISPR       | Plasmid used for replacing the promoter of <i>cpdA</i> with J23102-RBS004. Carb <sup>r</sup> | This study.           |
| J23102-RBS017- <i>cpdA</i> -PCRISPR       | Plasmid used for replacing the promoter of <i>cpdA</i> with J23102-RBS017. Carb <sup>r</sup> | This study.           |

Ref 1. doi: 10.1016/j.isci.2018.07.024

Continued on next page

| Plasmid                                               | Description                                                                                                             | Source      |
|-------------------------------------------------------|-------------------------------------------------------------------------------------------------------------------------|-------------|
| J23102-RBS021- <i>cpdA</i> -PCRISPR                   | Plasmid used for replacing the promoter of <i>cpdA</i> with J23102-RBS021. Carb <sup>r</sup>                            | This study. |
| PA1-RBS017- <i>bPAC</i> -CTX2                         | Plasmid used for chromosomal insertion of PA1-RBS017- <i>bPAC</i> at attB site. Tetr                                    | This study. |
| PA1O4O3- <i>bPAC</i> -CTX2                            | Plasmid used for chromosomal insertion of PA1O4O3- <i>bPAC</i> at attB site. Tetr                                       | This study. |
| J23102-RBS002- <i>cpdA</i> -PCRISPR                   | Plasmid used for replacing the promoter of <i>cpdA</i> with J23102-RBS002. Carb <sup>r</sup>                            | This study. |
| J23102-RBS010- <i>cpdA</i> -PCRISPR                   | Plasmid used for replacing the promoter of <i>cpdA</i> with J23102-RBS010. Carb <sup>r</sup>                            | This study. |
| J23102-RBS014- <i>cpdA</i> -PCRISPR                   | Plasmid used for replacing the promoter of <i>cpdA</i> with J23102-RBS014. Carb <sup>r</sup>                            | This study. |
| J23102-RBS016- <i>cpdA</i> -PCRISPR                   | Plasmid used for replacing the promoter of <i>cpdA</i> with J23102-RBS016. Carb <sup>r</sup>                            | This study. |
| J23102-RBS020- <i>cpdA</i> -PCRISPR                   | Plasmid used for replacing the promoter of <i>cpdA</i> with J23102-RBS020. Carb <sup>r</sup>                            | This study. |
| J23102-RBS022- <i>cpdA</i> -PCRISPR                   | Plasmid used for replacing the promoter of <i>cpdA</i> with J23102-RBS022. Carb <sup>r</sup>                            | This study. |
| J23106-B0034- <i>cpdA</i> -PCRISPR                    | Plasmid used for replacing the promoter of <i>cpdA</i> with J23106-B0034. Carb <sup>r</sup>                             | This study. |
| J23115-B0034- <i>cpdA</i> -PCRISPR                    | Plasmid used for replacing the promoter of <i>cpdA</i> with J23115-B0034.                                               | This study. |
| J23110-B0034- <i>cpdA</i> -PCRISPR                    | Plasmid used for replacing the promoter of <i>cpdA</i> with J23110-B0034. Carb <sup>r</sup>                             | This study. |
| Plac- <i>sfGFP</i> -T0T1-J23102- <i>CyOFP</i> -pJN105 | cAMP reporter plasmid. Gm <sup>r</sup>                                                                                  | This study. |
| nanAp- <i>mScarlet</i> -J23102- <i>CyOFP</i> -pJN105  | Expression reporter protein mScarletI under control of nanAp ptomoter. Gm <sup>r</sup>                                  | This study. |
| nanAp- <i>mScarlet</i> -Plac- <i>CyOFP</i> -pJN105    | Expression reporter protein mScarletI and CyOFP under control of nanAp and Plac ptomoter, respectively. Gm <sup>r</sup> | This study. |

493 **Supplementary Table.8: Sequence list of screened cAMP responsive**  
494 **promoters.**

| <i>Promoter Sequence</i> |                                                                                                                                                                                                                                                                                                                                                                                                                                                      |
|--------------------------|------------------------------------------------------------------------------------------------------------------------------------------------------------------------------------------------------------------------------------------------------------------------------------------------------------------------------------------------------------------------------------------------------------------------------------------------------|
| nanAp                    | TCTCTGCTACCTGGCACGCTTTTCGGTCAGACCACCAACAAAAAGAAATAATG<br>CCACTTTAGTGAAGCAGATCGCATTATAAGCTTTCTGTATGGGGTGTGCTT<br>AATTGATCTGGTATAACAGGTATAAAGGTATATCGTTTATCAGACAAGCATC<br>ACTTCAGAGGTATTT                                                                                                                                                                                                                                                              |
| galSp                    | CGATCTGGATCACATTCGTTAACAAAACGGCTGTAACCGTTTCCATTGCTGT<br>GACTCGATTACGAAGTCCTGTATTCAGTGCTGACAAAATAGCCGCCAG<br>CAAGCAGTCATTTACTGCAATCTCATAACAGGTAGTGAAT                                                                                                                                                                                                                                                                                                 |
| pcKp                     | GTTGAATTTGCATCAATTTTCATTTCAGGAATGCGATTCCACTCACAATATTCCC<br>GCCATATAAACCAAGATTTAACCTTTTGAGAACATTTTCCACACCTAAAATG<br>CTATTTCTGCGATAATAGCAACCGTTTCGTGACAGGAATCACGGAGTTTTTT<br>GTCAAATATGAATTTCTCCAGATACGTAAATCTATGAGCCTTGTCGCGGTTA<br>ACACCCCCAAAAAGACTTTACTATTCAGGCAATACATATTGGCTAAGGAGCA<br>GTGAA                                                                                                                                                     |
| exuTp2                   | CGAAGATATTTTCGTGAGTTAGATCAATAAACGTAGTTAAAAAAATTACTC<br>TCAAAGTGGTAAATCTCGCTGCAGGCCGCGCCAGTACTGGCCTTGCTGTGCG<br>TCAGGTAATGTCCCTACAAATATTCCCACATTTGTGATGGCTCTCACCTT<br>TTAAAGTTGTATGACAAGTTATCTTTCTGCCGTGCGAAATCATAAGTCGA<br>CGGAATGCAAATTGCCGATTCATTCATTTGTTAGATGAATCGGGTTAACCC<br>GGTACGGAAGCCGAATTAGCACGAACTTTTCATGGCAACGTTTCGGGGCGT<br>GCCGGTTTTTTTTTCGGTTACCCGGTCGTAACCTAACATCTTCAGCCTCTGG<br>CGGGATGATGGCCGCGCTTCCTGCGGATATAACAAAACGATGAGGTTTTAC |
| nupGp                    | CGCCCCCTGACGATGCTCAGGGGCAAAAATGTTATCCACATCACAATTTTCGTT<br>TTGCAAATTGGGAATGTTTGCAATTATTTGCCACAGGTAACAAAAAACCA<br>GTCCGCGAAGTTGATAGAATCCCATCATCTCGCACGGTCAAATGTGCTTT<br>TTCAAACACTCATCCGCATCACGATGTGAGGAAATTAACATG                                                                                                                                                                                                                                     |
| deoCp2                   | GAAAGTGAATTATTTGAACCAGATCGCATTACAGTGATGCAAACCTTGTAAG<br>TAGATTTTCCTTAATTGTGATGTGTATCGAAGTGTGTTGCGGAGTAGATGT<br>TAGAATACTAACAACTCGCAAGGTGAATTTTATTGGCGACAAGCCAGGA<br>GAATGAA                                                                                                                                                                                                                                                                          |
| gatYp                    | ACTTTGCTACGGCTTCCCTATCGGGAGGCCGTTTTTTTTGCCTTTCACTCCT<br>CGAATAATTTTCATATTGTCGTTTTTTGTGATCGTTATCTCGATATTTAAA<br>AACAAATAATTTCAATTATATTTTGAAATCGAAAACAAACGACAGGATATG<br>AAA                                                                                                                                                                                                                                                                            |
| paaAp                    | GCGGAAAACATTAATGCACTGATAAATAATGATTTATAAAAAATAGGGTGCG<br>AAATCCGTCACAGTTCAAACATACAAAATTTGTGATTTTACTTAACTATT<br>GTGTAACCTTTCATAAAACAATGTGATTCGTGTTTTTAATTAATTCACGAA<br>AACTGGAATCGTAAAGGTGATGAC                                                                                                                                                                                                                                                        |
| glpABCp                  | CATTCATAAATTAAATGTGAATTGCCGCACACATTATTAATAAGATTT<br>ACAAAATGTTCAAAATGACGCATGAAATCACGTTTCACTTTCGAATTATG<br>AGCGAATATGCGCGAAATCAAACAATTCATGTTTTTACTATGGCTAAATG<br>GTAAAAAACGAACTTCAGAGGGATAACA                                                                                                                                                                                                                                                         |
